1 **Did position-effect guide the evolutionary dynamics of developmental gene**  
2 **expression?**

3

4 Meenakshi Bagadia<sup>§</sup>, Keerthivasan Raanin Chandradoss<sup>§</sup>, Yachna Jain, Harpreet Singh,  
5 Mohan Lal, Kuljeet Singh Sandhu\*

6

7 Department of Biological Sciences

8 Indian Institute of Science Education and Research (IISER) - Mohali

9 Knowledge City, Sector - 81, SAS Nagar 140306, India

10

11

12

13

14

15

16

17

18

19

20

21

22

23

24 <sup>§</sup>*Equal contribution*

25 *\*To whom correspondence should be addressed*

26 Kuljeet Singh Sandhu

27 Assistant Professor

28 Department of Biological Sciences

29 Indian Institute of Science Education and Research (IISER) - Mohali

30 E. mail: [sandhuks@iisermohali.ac.in](mailto:sandhuks@iisermohali.ac.in)

31

32

33 **Abstract**

34 Conserved noncoding elements (CNEs) have significant regulatory influence on their neighbouring  
35 genes. Loss of synteny to CNEs through genomic rearrangements can, therefore, impact the  
36 transcriptional states of the cognate genes. Yet, the evolutionary implications of such chromosomal  
37 position effects have not been studied. Through genome-wide analysis of CNEs and the cognate  
38 genes of representative species from 5 different mammalian orders, we observed significant loss of  
39 synteny to CNEs in rat lineage. The CNEs and genes losing synteny had significant association with  
40 the fetal, but not the post-natal, brain development as assessed through ontology terms,  
41 developmental gene expression, chromatin marks and genetic mutations. The loss of synteny  
42 correlated with the independent evolutionary loss of fetus-specific upregulation of genes in rat  
43 brain. DNA-breakpoints implicated in brain abnormalities of germ-line origin had significant  
44 representation between CNE and the gene that exhibited loss of synteny, signifying the underlying  
45 developmental tolerance of genomic rearrangements that had allowed the evolutionary splits of  
46 CNEs and the cognate genes in rodent lineage. These observations highlighted the non-trivial impact  
47 of chromosomal position-effect in shaping the evolutionary dynamics of mammalian brain  
48 development and might explain loss of brain traits, like cerebral folding of cortex, in rodent lineage.

49

50 **Author Summary**

51 Expression of genes is regulated by proximally located non-coding regulatory elements. Loss of linear  
52 proximity between gene and its regulatory element thus can alter the expression of gene. Such a  
53 phenomenon can be tested at whole genome scale using evolutionary methods. We compared the  
54 positions of genes and regulatory elements in 5 different mammals and identified the significant loss  
55 of proximities between gene and their regulatory elements in rat during evolution. Brain  
56 development related function was selectively enriched among the genes and regulatory elements  
57 that had lost the proximity in rat. The observed separation of genes and their regulatory elements  
58 was strongly associated with the evolutionary loss of developmental gene expression pattern in rat  
59 brain, which coincided with the loss of brain traits in rodents. The study highlighted the importance  
60 of relative chromosomal positioning of genes and their gene regulatory elements in the evolution of  
61 phenotypes.

62

63 **Keywords:** conserved non-coding elements, enhancer, genome organization, synteny, evolution,  
64 position-effect.

65

66

## 67 **Introduction**

68 Around 4-8% of the human genome is evolutionary constrained, of which coding elements  
69 contribute only about 1.5%, while rest is non-coding (1-3). Massive data produced by ENCODE and  
70 Epigenome Roadmap projects have confirmed that majority of the evolutionary constrained non-  
71 coding DNA serve as protein binding sites(4, 5). These conserved noncoding elements (CNEs) are  
72 interwoven with the protein coding genes in a complex manner. Ample evidence converges to non-  
73 trivial regulatory impact of CNEs on proximal gene. Deletion of a non-coding region between  
74 sclerostin (SOST) gene, a negative regulator of bone formation, and MEOX1 impacts the expression  
75 of SOST and is strongly associated with Van Buchmen disease characterized by progressive  
76 overgrowth of bones (6). Similarly, deletion of a 10kb non-coding region downstream to stature  
77 homeobox (SHOX) gene is associated with Leri Weill dyschondrosteosis syndrome, a skeletal  
78 dysplasias condition (7). Mutations in CNEs downstream to PAX6 gene prevent its expression and are  
79 associated with Aniridia, a congenital eye malformation. Genetic errors in locus control region (LCR)  
80 at alpha and beta globin loci strongly associate with alpha/beta-thalassemia (8, 9). Maternal deletion  
81 of Igf2/H19 ICR disrupts the Igf2 imprinting leading to bi-allelic expression of Igf2, which is strongly  
82 associated with Beckwith Weidman syndrome (10). Loss of a CNE proximal to androgen receptor is  
83 strongly associated with evolutionary loss of penile spines and sensory vibrissae in human (11).

84

85 Around 200,000 human-anchored Conserved Non-coding Elements (CNEs) have been identified in  
86 mammals, which are likely to exhibit gene regulatory potential, as measured through enhancer-  
87 associated chromatin marks (12-14). Most CNEs position around developmental genes (14-16).  
88 However, establishing causal relationship between CNE and the phenotype remains a daunting task.  
89 Though genome wide association studies (GWAS) have uncovered a whole repertoire of non-coding  
90 variants with phenotypic associations (17), it is difficult to identify the causal variants. More recently,  
91 pooled CRISPR-Cas technique has been implemented to alter the non-coding elements to assess  
92 their function more precisely (18). These methods are difficult to be scaled up for high throughput  
93 genotype-phenotype associations. With the availability of whole genome sequences of multiple  
94 species, evolutionary methods are instrumental in deciphering genotype-phenotype associations.  
95 Through comprehensive multi-species comparison, it has been inferred that most CNEs are syntenic  
96 to the nearest gene in linear proximity and are likely to regulate the same (14, 19). Attempts have  
97 been made to link evolutionary loss and sequence divergence of CNEs to lineage specific traits, like  
98 auditory system in echo-locating mammals and adaptively morphed pectoral flippers in marine  
99 mammals (20, 21). In this study, we asked the question whether the lineage-specific evolutionary  
100 alterations in relative chromosomal positions of CNEs are associated with lineage-specific changes in

101 gene expression. Through analysis of chromosomal positions of orthologous CNEs and genes from 5  
102 different mammals, we observed that a significant number of genes had lost synteny to their  
103 adjacent CNEs independently in rat lineage. This loss of synteny was significantly associated with the  
104 down-regulation of genes involved in neurogenesis and neuronal migration during fetal brain  
105 development, which coincided with the evolutionary loss of several brain traits independently in rat  
106 lineage. The study suggested significant contribution of chromosomal position-effect in the  
107 evolutionary divergence of developmental gene expression trajectories in mammals.

108

## 109 **Results**

### 110 **Loss of synteny between CNE and the proximal gene**

111 Using chromosomal position data of CNEs and genes from representative primate (human), rodent  
112 (rat), carnivore (dog), perrisodactyl (horse), and artiodactyls (cow), we obtained 51434 'syntenic'  
113 CNE-gene pairs (4241 genes), wherein the CNE and the nearest gene-TSS were <1 Mb distance apart  
114 in all 5 species. There were 3579 'non-syntenic' CNE-gene pairs (334 genes), wherein the CNE and  
115 the gene-TSS were on different chromosomes or were >2Mb apart independently in one of the  
116 species (Figure 1A, Figure S1, Methods). The rationale of 1Mb distance cutoff for the synteny was  
117 based on the observation that the distribution of all CNE-gene distances saturated when approached  
118 1Mb range (Figure 1B). Similar approach has been used earlier to infer enhancer-promoter linkage  
119 based on evolutionary syntney between the two in 1Mb range(19). The distance cut-off of 2Mb for  
120 loss of synteny made sure that the minimal expansion in CNE-gene distance would at-least be 2 fold.  
121 To test if the CNEs in syntenic and non-syntenic sets were comparable, we assessed their lengths  
122 and degree of conservation in mammalian genomes. Figure 1C showed insignificant differences in  
123 the degree of sequence conservation of syntenic and non-syntenic CNEs, suggesting that the  
124 sequence of non-syntenic CNEs had not diverged among mammals as compared to that of syntenic  
125 CNEs. The length distribution of syntenic and non-syntenic CNEs showed only marginal difference  
126 towards slightly longer CNEs in non-syntenic set (Figure 1D). However, the syntenic and non-syntenic  
127 CNEs were located in the genomic domains of distinct sequence properties. We analysed the  
128 enrichment of SINE, LINE and LTR retrotransposons, which covers upto 50% of mammalian genome,  
129 around syntenic and non-syntenic CNEs. Syntenic CNEs were enriched in the region of open  
130 chromatin, as signified through greater enrichment SINE content, and might have more wide-spread  
131 role across different cell-lineages as compared with the non-syntenic CNEs (Figure 1E). In contrast,  
132 the non-syntneic CNEs were located in the domains enriched with long terminal repeats (LTR),  
133 marking their susceptibility to genomic rearrangements through mechanisms like non-allelic  
134 homologous recombination (NAHR) (22, 23) (Figure 1E). LINE elements, in general, did not exhibit

135 significant difference in the two sets. These observations were largely consistent across species,  
136 marking an ancestral property (Figure 1E), except in the rat wherein the LINE elements were  
137 enriched around non-syntenic CNEs. This exception can be explained by the fact that the rodents  
138 retained least of the ancestral retrotransposons as compared to most other mammals and had  
139 accumulated newer elements(24).

140

141 Relatively large number of syntenic CNE-gene pairs (93.5%) confirmed the widespread conservation  
142 of linear proximity between CNE and its adjacent gene (14). Among the total 3579 non-syntenic  
143 instances, 2711 (75%) were associated with the rat genome alone, coherent with the significantly  
144 greater number of structural variations in rodent clade(25) (Figure 2A-B). Positive scaling between  
145 number of non-syntenic instances and the break-point distances of species from the common  
146 ancestor signified that CNE-gene synteny was an ancestral trait (Figure 2B). Due to significant loss of  
147 synteny in rat lineage as compared to others, we focussed on rat instances in this study. By 'Loss of  
148 synteny' or 'non-syntenic' set, we referred to loss of CNE-gene synteny in rat from figure 2C  
149 onwards. To directly assess the proportion of non-syntenic CNE-gene pairs associated with structural  
150 variations, we analysed the rodent-specific evolutionary break-points (Methods). We observed that  
151 930 (34%) of all non-syntenic instances in rat had at-least one rodent-specific break-point in  
152 between the gene-TSS and the CNE as compared to 319 (11%) on an average for the random null  
153 prepared through distance-controlled bootstrap sampling of syntenic CNE-gene pairs (Figure 2C,  
154 Methods). This suggested that the loss of CNE-gene synteny in rat could largely be explained through  
155 rodent-specific genomic rearrangements (Figure 2C). We further argue that the sequence alignment  
156 based annotations of evolutionary breakpoints might not represent the entire repertoire of genomic  
157 rearrangements and, therefore, analysed the neighbouring genes on either side of non-syntenic  
158 CNEs to map the various rearrangement scenario through which CNE-gene synteny was lost. We  
159 found that that the translocation like scenario, as marked by (i) in Figure 2D, largely explained the  
160 inter-chromosomal (*trans*) splits of CNE and the adjacent gene. The scenario, which reflected the  
161 mapping artefacts, like in panel (iii), was under-represented (5%, Figure 2D). Analysis of intra-  
162 chromosomal (*cis*) splits suggested inversion-like events separating the CNE-gene pairs. Scenario (iv)  
163 and (v) showed events where region adjacent to CNE (on left side in scenario-iv and right side in  
164 scenario-v) had undergone local rearrangements, of which 30% and 90% events respectively were  
165 confirmed as inversion events by analysing the change in relative strand orientation of neighboring  
166 genes. We illustrated examples of *trans* and *cis* splits of CNE and the genes in Figure 2E. Gene  
167 POU3F2 on human chromosome 6 was syntenic to a CNE, which was 45Kb upstream. The  
168 orthologous CNE and the gene in rat were on chromosome 8 and 5 respectively marking the *trans*

169 split of CNE and the gene through translocation (Figure 2E). Another CNE was 18kb upstream to  
170 gene ADAM23 on human chromosome 2. The rat orthologues were separated by 2.4Mb on  
171 chromosome 9 through an inversion (Figure 2E).

172

173 We concluded that the rodent-specific genomic rearrangements largely explained the loss of CNE-  
174 gene synteny in rat.

175

#### 176 **Genes that had lost synteny to CNEs in rat were associated with the fetal brain development**

177 Significant differences in the genomic attributes around syntenic and non-syntenic CNEs hinted at  
178 their distinct functional roles. To assess their functions, syntenic and non-syntenic gene-lists were  
179 subjected to Gene Ontology (GO) and Mammalian Phenotype Ontology (MPO) analyses. The analysis  
180 of GO terms revealed enrichment of general as well as various tissue-specific development related  
181 terms in the syntenic set, while non-syntenic set was specifically enriched with nervous system  
182 development related terms (Figure 3A). In MPO analysis, syntenic set exhibited of enrichment of  
183 neonatal lethality and skeletal phenotypes, while non-syntenic set was associated with brain  
184 morphology related phenotypes (Figure S2A). Species, other than rat, did not exhibit enrichment of  
185 any particular functional term, owing to smaller sample size.

186

187 We further followed the above observations through tissue-specific gene expression analysis in  
188 human. The syntenic set had widespread representation of genes expressed in different cell-lineages  
189 and, therefore, did not exhibit significant tissue-specificity, while genes in non-syntenic set were  
190 specifically expressed in brain (Figures 3B). The brain-specific expression of genes in non-syntenic  
191 set was also confirmed through enrichment analysis of anatomical terms from *bgee* database (Figure  
192 S2B). Within brain, non-syntenic set was enriched with the genes specifically expressed in cerebral  
193 cortex during fetal, but not post-natal development (Figure 3C). In contrast, the genes in syntenic set  
194 did not exhibit any specificity for brain tissues and developmental stages (Figures 3C). These  
195 observations highlighted fetal brain-specific roles of genes in the non-syntenic set.

196

#### 197 **Non-syntenic CNEs function as fetal brain-specific enhancers**

198 To test whether the differences between syntenic and non-syntenic sets observed through  
199 functional analysis of genes, were coherent with the associated CNEs, we tested the regulatory  
200 potential of CNEs by analyzing their epigenomic properties across tissues. Through analysis of  
201 enhancer associated chromatin state annotations from Epigenome Roadmap, ENCODE and Fantom  
202 consortia (Methods), we observed that 74% of syntenic and 61% of non-syntenic CNEs overlapped

203 with the enhancer-associated regulatory sites in at-least one of the tissues or cell-types, marking the  
204 enhancer potential of CNEs. Relatively less representation of enhancers in the non-syntenic set  
205 might relate to their tissue or developmental stage specific functions, a hypothesis that we further  
206 reconciled through detailed analysis of histone modification associated with enhancers, namely  
207 Histone-3-Lysine-4-mono-methylation (H3K4me1). We chose this mark because of its strong  
208 association with the enhancer potential and the availability of genome-wide datasets for all the cell-  
209 lineages we were interested in. We observed that: 1) the CNEs in syntenic set exhibited consistent  
210 H3K4me1 enrichment across several fetal and adult tissues like thymus (endodermal), muscle  
211 (mesodermal), heart (mesodermal), intestine(endodermal) and brain (ectodermal) (Figure 4A, Figure  
212 S3A-B); 2) H3K4me1 enrichment over CNEs in non-syntenic set was specifically higher (comparable  
213 to that of syntenic CNEs) in fetal, but not in adult brain (Figure 4A). We further observed the  
214 significant enrichment of binding sites of ectoderm-specific transcription factors, which were  
215 specifically upregulated in fetal brain, in non-syntenic CNEs as compared to syntenic CNEs (Figure S4,  
216 Methods). These observations were largely coherent with our proposal that non-syntenic CNE-gene  
217 pairs were associated with fetal brain development.

218

219 To assess the physical enhancer-promoter association, we generated virtual 4C data by processing  
220 available HiC datasets of fetal and adult human brains (Figure S3C). Figure 4B showed the significant  
221 fetal-to-adult ratio of the proportion of non-syntenic CNE-gene pairs showing significant physical  
222 interactions as compared to that of syntenic CNE-gene pairs. We illustrated the physical interactions  
223 between CNE and the gene through examples (Figure 4C, Figure S3D). Transcription start sites of  
224 GPR85 and FEZF2 genes, both associated with neurological phenotypes(26-28), showed significant  
225 interaction frequency to their cognate CNEs in human fetal brain, but not in adult brain. The  
226 H3K4me1 signals at TSSs and CNEs were also significant in fetal brain as compared to adult.  
227 Epigenomic analyses thus suggested that the majority of the non-syntenic CNEs exhibited enhancer  
228 associated hallmarks in fetal brain.

229

230 By mapping the trait/disease associated SNPs from Genome Wide Associated Studies (GWAS) and  
231 the nearby SNPs (proxy) in the linkage disequilibrium based on 1000 genome data, we observed that  
232 105 of the non-syntenic CNEs were having at-least one brain related SNP (Figure 4D). This  
233 representation was statistically significant when compared with that of syntenic set (Figure 4D).  
234 These observations represented genetic evidence of brain-specific roles of non-syntenic CNEs. We  
235 highlighted the example of EPHA4 gene, which is required for radial neuron migration and is  
236 involved in the pathways leading to lissencephaly and schizophrenia in human(29, 30). Upstream

237 CNE to this gene had a schizophrenia associated SNP. Fetal brain specificity of CNE and gene  
238 expression was illustrated using H3K4me1 and RNA-seq tracks of fetal and post-natal human brains  
239 (Figure 4E).

240

241 Therefore, our observations through enhancer datasets, epigenomic marks, differential motif  
242 enrichment analysis and brain associated SNPs concomitantly established that the non-syntenic  
243 CNEs were specific to fetal brain development in human.

244

#### 245 **Developmental tolerance loss of synteny events**

246 While we have shown that the genes and the CNEs that had lost synteny in rat were associated with  
247 fetal brain development, whether or not CNE-gene proximity was causally linked with the brain-  
248 specific expression of the cognate gene remained to be addressed. Towards this, we assessed the  
249 representation of germ-line breakpoints associated with the congenital disorders exhibiting brain  
250 abnormalities and the somatic cancer breakpoints, between CNE and gene-TSS in syntenic and non-  
251 syntenic sets. Since the observed germ-line break-points are the ones that had survived through  
252 germ-line and the embryonic development, their presence and absence between CNE and the  
253 adjacent gene signifies developmental tolerance and intolerance respectively of loss of CNE-gene  
254 synteny. On the contrary, the cancer breakpoints of somatic origin do not undergo such selection  
255 and hence do not indicate the developmental tolerance or lack thereof. Figure 5A showed relative  
256 proportion of non-syntenic CNE-gene pairs having at-least one DNA breakpoint between gene-TSS  
257 and the CNE superimposed onto random null prepared from syntenic CNE-gene pairs of similar  
258 distance distribution as that of non-syntenic. We observed significantly greater representation of  
259 germ-line breakpoints in non-syntenic set as compared to syntenic set, while representation of  
260 somatic breakpoints showed insignificant difference (Figure 5A). We interpreted that DNA  
261 breakpoints between non-syntenic CNE and the genes were developmentally tolerable and genomic  
262 rearrangements thereof in the ancestral genome might have served as an evolutionary substrate for  
263 position effect. We further showed a few examples of germ-line chromosomal rearrangements that  
264 had split the CNE and the adjacent gene in congenital disorders with brain abnormalities (Figure 5B).  
265 Example (i) in Figure 5B showed a chromothripsis event wherein an inversion had split the CNE-gene  
266 pair. The involved gene BCL11A regulates cortical neuron migration and mutations therein associate  
267 with microcephaly and intellectual disability in human(31). BCL11A gene also exhibited 3.6 fold loss  
268 of expression in peripheral blood of the patient having genomic rearrangement as compared with  
269 the normal mother of the patient. Example (ii) showed a translocation event splitting a CNE and  
270 CCDC68 gene. Genetic mutations in CCDC68 are associated with schizophrenia, bipolar disorder and



271 autism(32). In example (iii), an inversion had split the CNE from DNAJB6 gene, which has role in  
272 neuritogenesis and neuroprotective functions(33).

273

#### 274 **Loss of synteny to CNEs coincided with the loss of fetus-specific upregulation of genes in rat brain**

275 An important question was whether or not the evolutionary loss of CNE-gene synteny in rat was  
276 associated with the loss of expression. To assess the functional fate of associated genes, we  
277 compared their time-course gene expression trajectories for developing cerebral cortex of human,  
278 rat and sheep (as an out-group). Sheep was included in the analysis due to the availability of gene  
279 expression datasets for pre- and post-natal tissues. We found that 99.4% of CNE-gene pairs that had  
280 lost synteny in rat were syntenic in sheep too, confirming the independent loss of synteny in rat  
281 lineage. We observed relative loss of fetus-specific gene expression in rat brain as compared to that  
282 of human and sheep, suggesting that the loss of synteny correlates with the loss of fetus-specific  
283 gene expression in developing rat brain (Figure 6). Enrichment of neurogenesis related genes and  
284 down-regulation thereof in fetal brain of rat has implications in understanding loss of brain traits in  
285 rat lineage, as discussed in detail in the discussion section.

286

287 Taken together, our analysis suggested a strong association between evolutionary dynamics of  
288 chromosomal positions of gene regulatory elements and the gain or loss of gene expression, aligning  
289 to the notion of ‘position effect’. Tissue and developmental stage specific impact of position effect  
290 highlighted the possibility of its significant role in altering developmental dynamics towards  
291 evolutionary gain or loss of lineage-specific traits.

292

#### 293 **Discussion**

294 It is not always the change in number and the sequence of protein coding regions in the genome  
295 that leads to the phenotype alternation in evolution, the dynamics of gene expression is equally  
296 relevant in the context. One way the gene expression is altered is through position-effect, i.e.,  
297 relative chromosomal position of the gene in the genome can alter its expression through regulatory  
298 elements and chromatin states in the neighbourhood. Position effect was first discovered through  
299 the observation that the chromosomal arrangement of duplicated copies of *bar* gene in *bar*-mutant  
300 flies had influence on its expression and consequently causes the relative decrease in number of eye  
301 facets (34, 35). Similarly, *white* gene when localized near heterochromatin gives mottled eye  
302 phenotype with red and white patches in drosophila eye (36, 37). Despite its significance, the role of  
303 position effect in evolution of traits has not been investigated thoroughly. Through comparative  
304 genomic analysis, we showed that the CNE-gene pairs that were syntenic in most mammals, but lost

305 the close linear proximity independently in rat were associated with the alteration in the  
306 transcriptional program during fetal brain development, presenting evidence how the position-effect  
307 might have impacted the evolution of lineage-specific phenotypes by modulating the developmental  
308 trajectories in early stages.

309

310 Enhancers can function at distance longer than several Mbs and spatial synteny has been observed  
311 among genomic regions that had been rearranged in the evolution(38, 39). How might then the loss  
312 of linear proximity to CNEs downregulate the expression of genes? Position effect significantly alters  
313 the expression noise of the genes(40). Evidence also suggests that long-range or trans enhancer  
314 promoter interactions occur at the cost of increased expression noise(41-43). As a result, the overall  
315 expression level in a tissue is expected to decline due to increased stochastic fluctuations in gene  
316 expression across cells. Therefore, we hypothesized that the loss of linear proximity between CNE  
317 and the gene would have compromised with the expression level of the gene by allowing stochastic  
318 variations in enhancer-promoter interactions.

319

320 Enrichment of brain development related genes in the non-syntenic set might relate to  
321 developmental plasticity of brain as compared to other tissues. Genomic alterations at the loci  
322 important for the development of basic body plan and functioning would be embryonic lethal, which  
323 largely explained the significant representation of skeletal/heart development and neonatal lethality  
324 related genes in the syntenic set (Figure 3A, S2A). Brain, despite having neurodevelopment plasticity,  
325 exhibits least genome-wide expression divergence across mammalian species(44, 45), but within the  
326 space of small non-syntenic gene-set the expression divergence was observed. This suggested that  
327 the least expression divergence observed for brain were due to cellular functions that needed to be  
328 precisely regulated to maintain delicately shaped brain tissues of all the mammals in general, while  
329 the ones that exhibited divergence would implicate in developmental functions specific to fetal  
330 brain. Our data showed that one of the ways, such expression divergence was modulated in the  
331 evolution was through alteration of genomic proximity between CNEs and the neighbouring genes.  
332 Fetus brain-specific downregulation of neurogenesis related genes that had lost synteny to CNEs in  
333 rat aligned to the hypothesis that observed genomic alterations might link to brain traits that were  
334 lost in rodent lineage. We showed evidence that among the species taken in this analyses, rat  
335 exhibited most number of independently modified brain traits, including the ones directly associated  
336 with neurogenesis, like absence of cerebral folding of cortex, absence of claustrum separation from  
337 cortex, absence of lateral geniculate nucleus magnocellular layer etc. (Figure S5). Of these, loss of  
338 cerebral folding of cortex, i.e., lissencephalic or smooth brain phenotype is the largest visible

339 alteration in the rodent brains. Folded or gyrencephalic brain, in general, is considered as adaptation  
340 for the mammals with greater encephalization quotient, intelligence and complex behavioural  
341 traits(46, 47). It can, therefore, be contended that the CNE-gene proximity and the associated fetal  
342 brain-specific expression was not lost in rat, but were rather gained in other mammals that had  
343 bigger and gyrencephalic brains. However, we argue that significant non-uniformity in cerebral  
344 cortex has been observed across several different mammalian species(48) and the assumption that  
345 the common ancestor of placental mammals had a smaller and simpler brain has been challenged  
346 recently(49, 50). Evidence converges to gyrencephalic brain of eutherian ancestor and the  
347 subsequent loss of cortical gyration in some lineages including rodents has been supported(51). The  
348 enrichment of genes associated with brain morphology phenotypes (Figure S2), ECM-receptor  
349 interactions & actin cytoskeleton regulation (ACTN, ITGA1, ITGA11, ASAP1, LAMB4, CD36 etc), and  
350 the ones implicated in human cortical malformations (MYCN, NRXN1, RASA1, DDX11, FEZF2, EFNA5,  
351 GLI3 etc.) (52) in the non-syntenic set further supported the loss of synteny in rat rather than gain of  
352 synteny in other mammals (Figure S6). We also emphasized that the loss of synteny in rat was  
353 inferred by filtering the CNE-gene pairs which were syntenic in all other species, hence were  
354 evolutionarily constrained, except in rat. Assessing gain of synteny was difficult because a CNE-gene  
355 pair that was non-syntenic in all species except one cannot be considered as evolutionarily  
356 constrained CNE-gene pair. We suspected that gain of synteny inferred in this flawed manner would  
357 not have shown any functional association. This indeed was observed through an independent  
358 analysis (Figure S6).

359

360 It remains arguable whether or not the alterations in brain traits in rodent lineage represented the  
361 adaptive selection or was a product of neutral drift. Some studies have suggested that smaller and  
362 lissencephalic brain was adaptively selected among mammals with distinct life history traits, like  
363 narrow habitat and smaller social groups, than that of gyrencephalic species(50). Distinct neurogenic  
364 potential of gyrencephalic and lissencephalic species has been attributed to the observed  
365 difference(50). Increased proliferative potential of basal progenitor cells is necessary and sufficient  
366 to explain the gyrencephalic brains(50). The loss of such proliferative potential, which was likely an  
367 ancestral trait, might have caused inefficient neurogenic program in lissencephalic species. Our  
368 observation that the genes that had lost the synteny to CNEs in rat were involved in neuronal  
369 differentiation and were downregulated in fetal rat brain is largely coherent with the above  
370 proposal.

371

372 Altogether, our observations highlighted the link between genome order and the evolutionary  
373 dynamics of temporal gene expression pattern associated with mammalian brain development. The  
374 study also suggested that the genomic rearrangements, without any change in the genomic content,  
375 might impact the developmental trajectories and shape the evolution of phenotypes.

376

## 377 **Acknowledgement**

378 Financial support to KSS from Department of Science and Technology (EMR/2015/001681) is duly  
379 acknowledged. MB and ML were financially supported by IISER-Mohali. KRC, YJ and HS thank ICMR,  
380 CSIR and SERB-DST agencies respectively for their fellowships.

381

## 382 **Methods**

### 383 **Compilation of chromosomal position data**

384 Human (hg19), rat (rn5), dog (camFam3), horse (equCab2) and cow (bosTau6) genome assemblies  
385 were used in the analysis. Conserved Non-coding Elements (CNEs) were taken from Marcovitz et al  
386 (Marcovitz et al.2016), which in turn were obtained by curating mammalian CNEs anchored to the  
387 human genome (hg19). Our choice of the aforementioned species and the CNE dataset was  
388 constrained by following considerations: i) We wanted sufficient evolutionary depth in the analysis  
389 and Marcovitz et al had considered 20 sequenced mammalian genomes to identify CNEs; 2) Since our  
390 analysis considered the chromosomal positions of CNEs and the genes, we only considered the  
391 genomes for which complete chromosome assemblies were available. For example, chromosome  
392 assemblies for the orders Cetacean, Chiroptera and Proboscidea etc. are not presently available; 3)  
393 In order to obtain the sufficient number of orthologous genes across species, we restricted our  
394 analysis to fewer mammalian lineages only. Considering multiple species would have compromised  
395 the total number of orthologous genes to start with.

396

397 We obtained the orthologue positions of human CNEs in query species using standard approach of  
398 mapping through LiftOver (<https://genome-store.ucsc.edu/>) chains at 0.95 mapping coverage(21).  
399 Finally, we compiled 114219 CNEs that were having orthologous positions in all 5 species. We  
400 independently obtained the table of orthologous genes across 5 mammals from Ensembl. Using CNE  
401 and gene tables, the list of nearest genes that were within 1Mb to the CNEs was obtained for  
402 human. The position of orthologous CNEs and genes in other mammals were assessed and CNE-gene  
403 pairs were classified as syntenic if the distance between the two was less than 1Mb in all 5 species  
404 and as non-syntenic if the CNE and the gene were >2Mb apart or were on different chromosomes in  
405 one of the species and remained within 1Mb in rest of the species. If there were multiple

406 orthologues for the same gene, we took the nearest gene to the CNE on the same chromosome to  
407 ensure that a syntenic pair should not have classified as non-syntenic due to orthologue redundancy.  
408 The distance cut-off of 1Mb was determined based on distribution of number of CNE-gene pairs at  
409 different distance cut-offs. At around 1Mb, the overall distribution approached a plateau and the  
410 numbers did not increase significantly after that (Figure 1B). The lack of synteny cut-off of 2Mb  
411 ensured that CNE and the gene were distant at-least by 2 fold in their non-syntenic form when  
412 compared to their syntenic form. Larger distance cut-off was also likely to be robust against the  
413 annotation artefacts of gene coordinates. A flow-chart illustrating the overall strategy is given in  
414 Figure S1. All the data are available in supplementary data file.

415

416 To assess the genome assembly artefacts, we mapped the non-syntenic CNE-pairs to known  
417 problematic regions of rat genome (<https://github.com/shwetaramdas/rataccessibleregions/>). Out  
418 of 2711 CNE, only 3 CNEs (0.1%) and out of total 245 genes, only three genes (ABCC6, FOS, BNIP2;  
419 1.2%) mapped to these regions. Exclusion of these regions was unlikely to change our claims. We  
420 further mapped the non-syntenic CNE-gene pairs of rn5 rat assembly to rn6 assembly. Out of 2711  
421 CNE-gene pairs, 2667 pairs (98.4%) were successfully lifted over to rn6. Total 2227 (83.5%) pairs  
422 maintained non-syntenic status in rn6 too (Figure S7A). Removing the ambiguous pairs did not alter  
423 the significance of brain association (Figure SB). We also replaced the ENSEMBL orthologue  
424 information by *other\_refseq* data in the above analysis to assess the correctness of orthologue  
425 mapping. The concordance of 83.5% and the persistence of brain association, therefore, confirmed  
426 that the observations presented in the article were robust against the technical artefacts of genome  
427 assembly and gene orthology.

428

#### 429 **Analysis of genomic attributes**

430 Chromosomal coordinates of repeat elements were downloaded from UCSC table browser. Repeat  
431 elements were mapped +/- 50kb around syntenic and non-syntenic CNEs and average value of  
432 enrichment in 2kb bins were plotted. For conservation analysis PhyloP scores of placental mammals  
433 (<http://ccg.vital-it.ch/mga/hg19/phyloP/phyloP.html>) were mapped +/- 1kb to CNE.

434

#### 435 **Functional enrichment analysis**

436 Gene Ontology and Mammalian Phenotype Ontology analysis was performed using GREAT  
437 (<http://bejerano.stanford.edu/great/public/html/>). Tissue specificity analysis was done using TSEA  
438 (<http://genetics.wustl.edu/jdlab/tsea/>), CSEA (<http://genetics.wustl.edu/jdlab/csea-tool-2/>). The

439 tissue specificity index (pSI) score of a gene  $i$  in a tissue  $k$ , over the given tissues  $j=1,2,\dots,m$  was  
440 calculated as per Dougherty et al (53) using following equation:

$$pSI_{i,k} = \frac{\sum_{j=2}^m \left( \text{rank} \left( \frac{x_{i,k}}{x_{i,j}} \right) \right)}{m-1}$$

441 Where  $x_{i,1}$  is the expression level of gene  $i$  in tissue 1 and  $x_{i,j}$  is the expression level of gene  $i$  in tissue  
442  $j$ . A stringent pSI cut-off of 0.05 was taken for the analysis. For syntenic gene set, we randomly  
443 sampled 245 genes (the size of non-syntenic gene set) from 4241 syntenic genes 100 times and  
444 plotted the mean and the standard error of the significance ( $-\log_{10}$  of corrected p-value) of overlap  
445 between the candidate gene-sets and the tissues specific genes in the genome. The random sample  
446 of syntenic genes that exhibited most significant overlap with the brain-specific genes was taken for  
447 the expression specificity analysis among brain tissues across developmental stages.

448

449 Normalized gene expression data for developing cerebral cortex and heart of human, rat and sheep  
450 were taken from BRAINSPAN (human cortex; <http://www.brainspan.org/static/download.html>),  
451 GSE71148(human heart), Stead et al (rat cortex), GSE53512 (rat heart), Clark et al (sheep cortex) and  
452 GSE66725 (sheep heart). Average gene expression with 90% confidence intervals were plotted across  
453 development time course.

454

#### 455 **Enhancer analysis**

456 Regulatory potential of CNEs was assessed by mapping ChromHMM data obtained from Epigenome  
457 roadmap ([http://egg2.wustl.edu/roadmap/web\\_portal/imputed.html#chr\\_imp](http://egg2.wustl.edu/roadmap/web_portal/imputed.html#chr_imp)) and ENCODE  
458 (<http://hgdownload.soe.ucsc.edu/goldenPath/hg19/encodeDCC/wgEncodeBroadHmm/>) projects  
459 onto CNEs. Enhancer coordinates from FANTOM (<http://enhancer.binf.ku.dk/presets/>) were also  
460 mapped to CNEs. Cumulative overlap across aforementioned three resources was calculated.  
461 Datasets for H3K4me1 methylation for fetal and post-natal/adult human tissues were obtained from  
462 Epigenome Roadmap (<http://www.roadmapepigenomics.org/data/>) with following accession IDs and  
463 age groups: fetal brain (E081, E082; 17GW), adult brain (E067, E068, E069, E071, E072, E073, E074;  
464 pooled 73Yr/75Yr/81Yr), fetal muscle (E089, E090; 15GW), post-natal muscle (E107; pooled  
465 54Yr/72Yr) and fetal thymus (E093; 15GW), post-natal thymus (E112; 3Yr), fetal heart (E083, 91  
466 days), post-natal heart (E95, E104, E105, pooled 3Yr/34Yr), fetal small intestine(E085, 15GW) and  
467 post-natal small intestine(E109, pooled 3Yr/30Yr). Fold-change over input DNA was used for  
468 aggregation plots. WashU epigenome browser was used for visualization. Motif analysis was  
469 performed through RSAT's 'peak-motif' package ([http://rsat.sb-roscoff.fr/peak-motifs\\_form.cgi](http://rsat.sb-roscoff.fr/peak-motifs_form.cgi))

470 using JASPAR core matrices for vertebrate genomes. Syntenic CNEs were taken as background  
471 control sequences.

472

#### 473 **Mapping of proxy GWAS SNPs**

474 Total 251835 GWAS SNPs were obtained from GWASdb (<http://jiwanglab.org/gwasdb>). From this  
475 data, 71990 brain related SNPs were obtained by analyzing the HPO terms associated with brain  
476 associated phenotypes. We extended this data to total 533388 nearby SNPs (proxy) that were in  
477 linkage disequilibrium to 71990 brain related GWAS SNPs based on 1000 genome data using SNAP  
478 algorithm (<https://personal.broadinstitute.org/plin/snap/index.php>). Random null was prepared by  
479 picking CNE samples, of same sample size and CNE-gene distance as of non-syntenic set, from the  
480 syntenic set 1000 times and mapping SNPs to each of these samples. Number of CNEs with at-least  
481 one SNP was counted for each sample. The distribution of these numbers was regarded as random  
482 null. P-value was calculated as following:

—

483 Where B = number of re-sampling iterations (1000)

484  $K_B$  = Number of sampled syntenic CNEs having at-least one SNP.

485  $K$  = Number of observed non-syntenic CNE having atleast one SNP.

486

#### 487 **Virtual 4C data**

488 SRA files of HiC datasets for fetal and adult brains were obtained from GSE77565 and GSE87112.  
489 Datasets were processed using HiCUP (<https://github.com/theaidenlab/juicer/wiki/HiCCUPS>) and  
490 contact maps were normalized using iterative correction and eigen vector decomposition (ICE)  
491 method (<https://github.com/hiclib/iced>). TSS in each CNE-gene pair was taken as bait (reference  
492 point) and its intra-chromosomal interactions were obtained from HiC matrices. Loess regression  
493 line was fit to the HiC counts as a function of genomic distance from the bait. Significant interactions  
494 with the bait were identified by applying cut-off of 3-standard deviation distance from the regression  
495 line (54).

496

#### 497 **DNA breakpoint analysis**

498 We obtained 552 germline breakpoints associated with congenital disorders having brain  
499 abnormalities and 68018 somatic cancer breakpoints from van Heesch et al (55). The matching RNA-  
500 seq data of peripheral blood of patient and the mother were obtained from European Nucleotide  
501 Archive(<https://www.ebi.ac.uk/ena>) with the accession IDs ERX358048 and ERX358046 respectively.

502 Total 2061 evolutionary DNA break-points for rodents were taken from Bourque et al (2004 & 2006),  
503 Larkin et al and Lemaitre et al (56-59). These breakpoints were then mapped onto inter-spacer  
504 regions between CNE and the nearest gene-TSS. The random null was obtained by picking CNE-gene  
505 pairs, of same sample size and CNE-gene distance as of non-syntenic set, from the syntenic set 1000  
506 times and mapping the breakpoint in the inter-spacer regions. Number of CNE-gene pairs with at-  
507 least one break-point in between was counted for each sample. The distribution of these numbers  
508 was regarded as random null. P-values was calculated using equation as in GWAS SNP analysis. The  
509 break-point distances from the ancestor were obtained from Luo et al(25).

510

### 511 **Mammalian traits**

512 Status of morphological traits in 5 mammals were obtained from project ID P773 of Morphobank  
513 database (<https://morphobank.org/>). Traits that exhibited same status atleast in 3 of the mammals  
514 including rat, but showed a different status in human were classified as independently modified  
515 traits in human. Similarly the traits that had same status in atleast 3 species including human, but  
516 changed status in rat were denoted as independently modified traits in rat.

517

518 **Availability of data.** All datasets presented in this article are available as supplementary data.

519

### 520 **References**

- 521 1. Rands CM, Meader S, Ponting CP, Lunter G. 8.2% of the Human genome is constrained:  
522 variation in rates of turnover across functional element classes in the human lineage. *PLoS Genet.*  
523 2014;10(7):e1004525.
- 524 2. Lindblad-Toh K, Garber M, Zuk O, Lin MF, Parker BJ, Washietl S, et al. A high-resolution map  
525 of human evolutionary constraint using 29 mammals. *Nature.* 2011;478(7370):476-82.
- 526 3. Thurman RE, Rynes E, Humbert R, Vierstra J, Maurano MT, Haugen E, et al. The accessible  
527 chromatin landscape of the human genome. *Nature.* 2012;489(7414):75-82.
- 528 4. Consortium EP. An integrated encyclopedia of DNA elements in the human genome. *Nature.*  
529 2012;489(7414):57-74.
- 530 5. Skipper M, Eccleston A, Gray N, Heemels T, Le Bot N, Marte B, et al. Presenting the  
531 epigenome roadmap. *Nature.* 2015;518(7539):313.
- 532 6. Loots GG, Kneissel M, Keller H, Baptist M, Chang J, Collette NM, et al. Genomic deletion of a  
533 long-range bone enhancer misregulates sclerostin in Van Buchem disease. *Genome Res.*  
534 2005;15(7):928-35.
- 535 7. Sabherwal N, Bangs F, Roth R, Weiss B, Jantz K, Tiecke E, et al. Long-range conserved non-  
536 coding SHOX sequences regulate expression in developing chicken limb and are associated with  
537 short stature phenotypes in human patients. *Hum Mol Genet.* 2007;16(2):210-22.
- 538 8. Driscoll MC, Dobkin CS, Alter BP. Gamma delta beta-thalassemia due to a de novo mutation  
539 deleting the 5' beta-globin gene activation-region hypersensitive sites. *Proc Natl Acad Sci U S A.*  
540 1989;86(19):7470-4.
- 541 9. Hatton CS, Wilkie AO, Drysdale HC, Wood WG, Vickers MA, Sharpe J, et al. Alpha-thalassemia  
542 caused by a large (62 kb) deletion upstream of the human alpha globin gene cluster. *Blood.*  
543 1990;76(1):221-7.



- 544 10. Sparago A, Cerrato F, Vernucci M, Ferrero GB, Silengo MC, Riccio A. Microdeletions in the  
545 human H19 DMR result in loss of IGF2 imprinting and Beckwith-Wiedemann syndrome. *Nat Genet.*  
546 2004;36(9):958-60.
- 547 11. McLean CY, Reno PL, Pollen AA, Bassan AI, Capellini TD, Guenther C, et al. Human-specific  
548 loss of regulatory DNA and the evolution of human-specific traits. *Nature.* 2011;471(7337):216-9.
- 549 12. Seridi L, Ryu T, Ravasi T. Dynamic epigenetic control of highly conserved noncoding  
550 elements. *PLoS One.* 2014;9(10):e109326.
- 551 13. Roh TY, Wei G, Farrell CM, Zhao K. Genome-wide prediction of conserved and nonconserved  
552 enhancers by histone acetylation patterns. *Genome Res.* 2007;17(1):74-81.
- 553 14. Babarinde IA, Saitou N. Genomic Locations of Conserved Noncoding Sequences and Their  
554 Proximal Protein-Coding Genes in Mammalian Expression Dynamics. *Mol Biol Evol.* 2016;33(7):1807-  
555 17.
- 556 15. Woolfe A, Goodson M, Goode DK, Snell P, McEwen GK, Vavouri T, et al. Highly conserved  
557 non-coding sequences are associated with vertebrate development. *PLoS Biol.* 2005;3(1):e7.
- 558 16. Akalin A, Fredman D, Arner E, Dong X, Bryne JC, Suzuki H, et al. Transcriptional features of  
559 genomic regulatory blocks. *Genome Biol.* 2009;10(4):R38.
- 560 17. Welter D, MacArthur J, Morales J, Burdett T, Hall P, Junkins H, et al. The NHGRI GWAS  
561 Catalog, a curated resource of SNP-trait associations. *Nucleic Acids Res.* 2014;42(Database  
562 issue):D1001-6.
- 563 18. Rajagopal N, Srinivasan S, Kooshesh K, Guo Y, Edwards MD, Banerjee B, et al. High-  
564 throughput mapping of regulatory DNA. *Nat Biotechnol.* 2016;34(2):167-74.
- 565 19. Naville M, Ishibashi M, Ferg M, Bengani H, Rinkwitz S, Krecsmarik M, et al. Long-range  
566 evolutionary constraints reveal cis-regulatory interactions on the human X chromosome. *Nature*  
567 *communications.* 2015;6:6904.
- 568 20. Davies KT, Tsagkogeorga G, Rossiter SJ. Divergent evolutionary rates in vertebrate and  
569 mammalian specific conserved non-coding elements (CNEs) in echolocating mammals. *BMC Evol*  
570 *Biol.* 2014;14:261.
- 571 21. Marcovitz A, Jia R, Bejerano G. "Reverse Genomics" Predicts Function of Human Conserved  
572 Noncoding Elements. *Molecular biology and evolution.* 2016;33(5):1358-69.
- 573 22. Chan JE, Kolodner RD. A genetic and structural study of genome rearrangements mediated  
574 by high copy repeat Ty1 elements. *PLoS genetics.* 2011;7(5):e1002089.
- 575 23. Roeder GS, Fink GR. DNA rearrangements associated with a transposable element in yeast.  
576 *Cell.* 1980;21(1):239-49.
- 577 24. Buckley RM, Kortschak RD, Raison JM, Adelson DL. Similar Evolutionary Trajectories for  
578 Retrotransposon Accumulation in Mammals. *Genome biology and evolution.* 2017;9(9):2336-53.
- 579 25. Luo H, Arndt W, Zhang Y, Shi G, Alekseyev MA, Tang J, et al. Phylogenetic analysis of genome  
580 rearrangements among five mammalian orders. *Molecular phylogenetics and evolution.*  
581 2012;65(3):871-82.
- 582 26. Matsumoto M, Straub RE, Marengo S, Nicodemus KK, Matsumoto S, Fujikawa A, et al. The  
583 evolutionarily conserved G protein-coupled receptor SREB2/GPR85 influences brain size, behavior,  
584 and vulnerability to schizophrenia. *Proc Natl Acad Sci U S A.* 2008;105(16):6133-8.
- 585 27. Chen L, Zheng J, Yang N, Li H, Guo S. Genomic selection identifies vertebrate transcription  
586 factor Fezf2 binding sites and target genes. *The Journal of biological chemistry.* 2011;286(21):18641-  
587 9.
- 588 28. Eckler MJ, Larkin KA, McKenna WL, Katzman S, Guo C, Roque R, et al. Multiple conserved  
589 regulatory domains promote Fezf2 expression in the developing cerebral cortex. *Neural*  
590 *development.* 2014;9:6.
- 591 29. Steinecke A, Gampe C, Zimmer G, Rudolph J, Bolz J. EphA/ephrin A reverse signaling  
592 promotes the migration of cortical interneurons from the medial ganglionic eminence.  
593 *Development.* 2014;141(2):460-71.

- 594 30. Senturk A, Pfennig S, Weiss A, Burk K, Acker-Palmer A. Ephrin Bs are essential components of  
595 the Reelin pathway to regulate neuronal migration. *Nature*. 2011;472(7343):356-60.
- 596 31. Wiegreffe C, Simon R, Peschkes K, Kling C, Strehle M, Cheng J, et al. Bcl11a (Ctip1) Controls  
597 Migration of Cortical Projection Neurons through Regulation of Sema3c. *Neuron*. 2015;87(2):311-25.
- 598 32. Cross-Disorder Group of the Psychiatric Genomics C. Identification of risk loci with shared  
599 effects on five major psychiatric disorders: a genome-wide analysis. *Lancet*. 2013;381(9875):1371-9.
- 600 33. Calabrese V, Scapagnini G, Ravagna A, Giuffrida Stella AM, Butterfield DA. Molecular  
601 chaperones and their roles in neural cell differentiation. *Developmental neuroscience*. 2002;24(1):1-  
602 13.
- 603 34. Sturtevant AH. A Further Study of the so-Called Mutation at the Bar Locus of *Drosophila*.  
604 *Genetics*. 1928;13(5):401-9.
- 605 35. Sturtevant AH. The Effects of Unequal Crossing over at the Bar Locus in *Drosophila*. *Genetics*.  
606 1925;10(2):117-47.
- 607 36. Martin-Morris LE, Csink AK, Dorer DR, Talbert PB, Henikoff S. Heterochromatic trans-  
608 inactivation of *Drosophila* white transgenes. *Genetics*. 1997;147(2):671-7.
- 609 37. Wallrath LL, Elgin SC. Position effect variegation in *Drosophila* is associated with an altered  
610 chromatin structure. *Genes Dev*. 1995;9(10):1263-77.
- 611 38. Veron AS, Lemaitre C, Gautier C, Lacroix V, Sagot MF. Close 3D proximity of evolutionary  
612 breakpoints argues for the notion of spatial synteny. *BMC genomics*. 2011;12:303.
- 613 39. Bagadia M, Singh A, Singh Sandhu K. Three Dimensional Organization of Genome Might Have  
614 Guided the Dynamics of Gene Order Evolution in Eukaryotes. *Genome biology and evolution*.  
615 2016;8(3):946-54.
- 616 40. Chen X, Zhang J. The Genomic Landscape of Position Effects on Protein Expression Level and  
617 Noise in Yeast. *Cell systems*. 2016;2(5):347-54.
- 618 41. Singh A, Bagadia M, Sandhu KS. Spatially coordinated replication and minimization of  
619 expression noise constrain three-dimensional organization of yeast genome. *DNA research : an*  
620 *international journal for rapid publication of reports on genes and genomes*. 2016;23(2):155-69.
- 621 42. Sandhu KS. Did the modulation of expression noise shape the evolution of three dimensional  
622 genome organizations in eukaryotes? *Nucleus*. 2012;3(3):286-9.
- 623 43. Kustatscher G, Grabowski P, Rappilber J. Pervasive coexpression of spatially proximal genes  
624 is buffered at the protein level. *Molecular systems biology*. 2017;13(8):937.
- 625 44. Khaitovich P, Enard W, Lachmann M, Paabo S. Evolution of primate gene expression. *Nat Rev*  
626 *Genet*. 2006;7(9):693-702.
- 627 45. Strand AD, Aragaki AK, Baquet ZC, Hodges A, Cunningham P, Holmans P, et al. Conservation  
628 of regional gene expression in mouse and human brain. *PLoS Genet*. 2007;3(4):e59.
- 629 46. Prothero JW, Sundsten JW. Folding of the cerebral cortex in mammals. A scaling model.  
630 *Brain, behavior and evolution*. 1984;24(2-3):152-67.
- 631 47. Toro R, Perron M, Pike B, Richer L, Veillette S, Pausova Z, et al. Brain size and folding of the  
632 human cerebral cortex. *Cerebral cortex*. 2008;18(10):2352-7.
- 633 48. Herculano-Houzel S, Collins CE, Wong P, Kaas JH, Lent R. The basic nonuniformity of the  
634 cerebral cortex. *Proc Natl Acad Sci U S A*. 2008;105(34):12593-8.
- 635 49. Rowe TB, Macrini TE, Luo ZX. Fossil evidence on origin of the mammalian brain. *Science*.  
636 2011;332(6032):955-7.
- 637 50. Lewitus E, Kelava I, Kalinka AT, Tomancak P, Huttner WB. An adaptive threshold in  
638 mammalian neocortical evolution. *PLoS biology*. 2014;12(11):e1002000.
- 639 51. Kelava I, Lewitus E, Huttner WB. The secondary loss of gyrencephaly as an example of  
640 evolutionary phenotypical reversal. *Front Neuroanat*. 2013;7:16.
- 641 52. Pinero J, Bravo A, Queralt-Rosinach N, Gutierrez-Sacristan A, Deu-Pons J, Centeno E, et al.  
642 DisGeNET: a comprehensive platform integrating information on human disease-associated genes  
643 and variants. *Nucleic acids research*. 2017;45(D1):D833-D9.

- 644 53. Dougherty JD, Schmidt EF, Nakajima M, Heintz N. Analytical approaches to RNA profiling  
645 data for the identification of genes enriched in specific cells. *Nucleic Acids Res.* 2010;38(13):4218-30.  
646 54. Klein FA, Pakozdi T, Anders S, Ghavi-Helm Y, Furlong EE, Huber W. FourCSeq: analysis of 4C  
647 sequencing data. *Bioinformatics.* 2015;31(19):3085-91.  
648 55. van Heesch S, Simonis M, van Roosmalen MJ, Pillalamarri V, Brand H, Kuijk EW, et al.  
649 Genomic and functional overlap between somatic and germline chromosomal rearrangements. *Cell*  
650 *Rep.* 2014;9(6):2001-10.  
651 56. Larkin DM, Pape G, Donthu R, Auviel L, Welge M, Lewin HA. Breakpoint regions and  
652 homologous synteny blocks in chromosomes have different evolutionary histories. *Genome Res.*  
653 2009;19(5):770-7.  
654 57. Bourque G, Zdobnov EM, Bork P, Pevzner PA, Tesler G. Comparative architectures of  
655 mammalian and chicken genomes reveal highly variable rates of genomic rearrangements across  
656 different lineages. *Genome Res.* 2005;15(1):98-110.  
657 58. Bourque G, Pevzner PA, Tesler G. Reconstructing the genomic architecture of ancestral  
658 mammals: lessons from human, mouse, and rat genomes. *Genome Res.* 2004;14(4):507-16.  
659 59. Lemaitre C, Zaghoul L, Sagot MF, Gautier C, Arneodo A, Tannier E, et al. Analysis of fine-  
660 scale mammalian evolutionary breakpoints provides new insight into their relation to genome  
661 organisation. *BMC Genomics.* 2009;10:335.

662

## 663 **Figure legends**

664 **Figure 1. Synteny and lack thereof between CNE and the nearest gene.** (a) Illustration of the strategy to infer  
665 the synteny and lack thereof between CNE and the neighboring gene across 5 representative mammalian  
666 orders. CNE-gene pairs were classified as syntenic if remained proximal (<1Mb) in all the 5 species and as non-  
667 syntenic if departed by > 2mb or on different chromosomes in on of the species while maintaining synteny in  
668 other 4 species. (b) Cumulative distribution of all CNE-gene distances in the human genome. Most CNE-gene  
669 pairs were <1Mb distance and, therefore, cut-off of 1Mb was applied for CNE-gene synteny. (c) Sequence  
670 conservation, as measured through mammalian PhyloP scores, and (d) length distribution of CNEs in syntenic  
671 and non-syntenic sets. (e) Enrichment of retrotransposons +/- 50Kb around syntenic and non-syntenic CNEs.  
672 Asterisk indicate significant p-values (<0.05) calculated using Mann Whitney U test of enrichment values +/-  
673 10kb around CNEs.

674

675 **Figure 2. Genomic rearrangements underlying the loss of synteny** (a) Number of non-syntenic instances and  
676 genes (in parentheses) in different mammals. P-value for the non-syntenic instances in rat and the next highest  
677 value (in dog) was calculated using Fisher's exact test. (b) Scaling between number of non-syntenic cases and  
678 the evolutionary break-point distance from the common mammalian ancestor. (c) Number of non-syntenic  
679 CNE-gene pairs having atleast one rodent-specific break-point inbetween CNE and gene-TSS, overlaid onto null  
680 distribution prepared from syntenic set. (d) Distinct *trans* and *cis* chromosomal rearrangements as inferred  
681 from the analysis of genes flanking the non-syntenic CNEs. Shown are the neighboring genes around CNE. Red  
682 color represents the target gene and orange color represents the nearest gene on the other side of the CNE.  
683 Red color in the barplot marks the proportion for which inversion could be confirmed through analysis of gene  
684 orientations. Shown are the two examples illustrating loss of CNE-gene synteny in rat. In first example, a CNE  
685 was located 45kb upstream to the gene POU3F2 in human, but were split on different chromosomes in rat.

686 Second example shows that an inversion event had distanced the CNE and the proximal ADAM23 gene upto  
687 2.4Mb in rat genome.

688

689 **Figure 3. Functional characterization of genes in syntenic and non-syntenic sets.** (a) Enrichment of Gene  
690 Ontology (GO) terms among genes in syntenic and non-syntenic sets. P-values shown were corrected using  
691 Benjamini-Hochberg method. (b) Tissue-specific expression analysis of genes in syntenic and non-syntenic set.  
692 Relative significance was plotted as negative of log<sub>10</sub> transformed corrected p-values of Fisher's exact test for  
693 the overlap with the tissue-specific genes at stringency score (pSI) < 0.05. Horizontal grey colored dashed line  
694 represents the p-value of 0.01. For syntenic set, mean values and standard errors of significance for 100  
695 random samples of 245 genes (the size of non-syntenic set) from syntenic sets were plotted. (c) Expression  
696 specificity of genes in syntenic and non-syntenic sets across brain regions and across developmental stages.  
697 For syntenic set, the sample that exhibited maximum significance for brain specificity in panel-b was taken.  
698 Size of the nested hexagons represents the proportion of all genes specifically expressed in particular tissue at  
699 particular developmental stage. Hexagons are nested inwards based on relative stringency of tissue specificity  
700 scores (pSI=0.05, 0.01, 0.001 & 0.0001 respectively). Color gradient represents the magnitude of corrected p-  
701 values of Fisher's exact test.

702

703 **Figure 4. Enhancer properties of syntenic and non-syntenic CNEs.** (a) H3K4me1 ChIP enrichment (over input)  
704 on and around CNEs in syntenic and non-syntenic sets in fetal and post-natal tissues. P-values for the  
705 difference between syntenic and non-syntenic CNEs were calculated using Mann Whitney U test of H3K4me1  
706 enrichment values in 1kb spanning windows on either side of the CNEs. (b) Virtual 4C analysis of CNE-gene  
707 interactions in fetal and adult human brains. The barplot shows fetal-to-adult ratio of proportion of CNE-gene  
708 pairs exhibiting significant physical chromatin interactions. (c) The examples of GPR85 and FEZF2 genes are  
709 shown for illustration. Vertical grey and yellow bars represent the TSS and CNE positions respectively. Red and  
710 grey curves show virtual 4C and h3K4me1 signals respectively. Black smooth line represents the loess fit of the  
711 4C signal as function of genomic distance from the reference point. The dotted line represents 3 $\sigma$  distance  
712 from the loess regression line. (d) Proportion of non-syntenic CNEs having at-least one brain associated SNP  
713 superimposed onto the null distribution obtained from syntenic CNEs. P-value was calculated using boot-strap  
714 method by randomly sampling 2711 CNEs (size of non-syntenic set) from syntenic set 1000 times. (e) An  
715 example of EPHA4 gene and its proximal CNE having a Schizophrenia associated GWAS SNP is shown. The  
716 tracks for PhyloP conservation score, H3K4me1 and RNA-seq data of fetal and post-natal brain aligned  
717 accordingly. The orthologous CNE and gene were 7.2 Mb apart on chromosome 9 in rat.

718

719

720 **Figure 5. Tolerance and intolerance of CNE-gene split.** (a) Number of non-syntenic CNE-gene pairs flanking at-  
721 least one germ-line breakpoint associated with the congenital disorders having brain abnormalities (upper  
722 panel) and somatic cancer breakpoint (lower panel), superimposed onto null distributions obtained from the  
723 syntenic set of same CNE-gene distance distribution as that of non-syntenic set. P-values were calculating

724 using boot-strap method with 1000 random samplings. (b) Examples illustrating chromothripsis, translocation  
725 and inversion events breaking CNE-gene synteny in congenital disorders with brain abnormalities. Mutations in  
726 BCL11A (i), CCDC68 (ii) and DNAJB6 (iii) genes are associated with abnormal brain phenotypes as elaborated in  
727 the results section. The right most panel shows difference in expression level of BCL11A gene in the patient  
728 having genomic rearrangement and the normal mother.

729

730 **Figure 6. Evolutionary dynamics of developmental gene expression associated with the loss of CNE-gene**  
731 **synteny.** Red curves in the plots represent the mean expression of genes in the non-syntenic set and grey area  
732 represents 95% confidence interval. Grey colored elongated triangles below the x-axis represent the fetal and  
733 post-natal time course. Lack of triangles at some places denotes unavailability of multiple time points in the  
734 data. Left panel represents cerebral cortex and right panel is for heart datasets (control).

735

736

### 737 **Supplementary Figure Legends**

738 **Figure S1.** Flowchart illustrating overall strategy to obtain syntenic and non-syntenic CNE-gene pairs.

739 **Figure S2.** Enrichment of (a) Mammalian Phenotype Ontology (MPO) terms , and (b) Bgee anatomical terms in  
740 syntenic (left panel) and non-syntenic (right panel) gene-sets. P-values were corrected using Benjamini-  
741 Hochberg method.

742

743 **Figure S3.** Extension of Epigenomic analyses of syntenic and non-syntenic CNEs. (A-B) H3K4me1 ChIP  
744 enrichment (over input DNA) around syntenic (grey) and non-syntenic (red) CNEs in (a) fetal, and (b) post-natal  
745 tissues. (C) Strategy used to assess the CNE-TSS interactions using HiC datasets of human fetal and adult  
746 brains. All-to-all HiC interactions were filtered for TSS-to-all interactions for the genes in syntenic and  
747 nonsynteic sets. The resultant data was analogous to 4C and was analyzed using method atypical for 4C  
748 analysis. Loess regression line was fit to 4C counts as a function of genomic distance from the reference point  
749 (TSS in this case). The distance of 3-standard deviation from this regression line was taken as significance cut-off  
750 for the interactions impinging onto TSS. (D) Example of CNE-TSS interactions identified in the non-syntenic set.  
751 Upper and lower panels represent fetal and adult brain data. Red line: 4C signal; grey line: H3K4me1; Black  
752 line: Loess fit; Dotted line: 3-standard deviation cut-off for significance.

753 **Figure S4.** Sequence motif enrichment analysis for non-synteic CNEs. 'Peak-motifs' from RSAT was used to  
754 identify over-represented sequence motifs in the non-synteic CNEs while taking syntenic CNEs as background  
755 control. (a) Sequence motifs, their e-values and the matching transcription factors (TFs) from JASPAR. (b)  
756 Tissue specificity analyses of TFs. Red bars represent the tissues, wherein the TFs exhibit significant specificity  
757 ( $P < 0.05$ ). (c) Time course gene expression of TFs during human brain development. Red curve represents  
758 average expression of TFs and grey colour denotes 90% confidence interval.

759 **Figure S5.** Independently modified traits in rat and human. (A) bar plot representing rat-to-human ratio for the  
760 proportion of traits independently modified in each trait class. (B) List of traits that were independetly  
761 modified in rat.

762 **Figure S6.** Analysis of gain of synteney instances in human. Gain of synteney instances were identified using the  
763 strategy shown. No enrichment was found in the GO process terms. The most enriched GO term is shown.

764 **Figure S7.**Comparison of non-syntenic (rat) CNE-gene pairs in rn5 and rn6 genome assemblies. (A) Shown is  
765 the scatter plot of CNE-gene distances (log10 scale) of the non-syntenic set in rn5 and rn6 assemblies. (B) Gene  
766 Ontology enrichment analysis of genes that had lost synteney consistently in both assemblies (83.5% of total).  
767 P-values are adjusted using Benjamini-Hochberg method.

768

**A**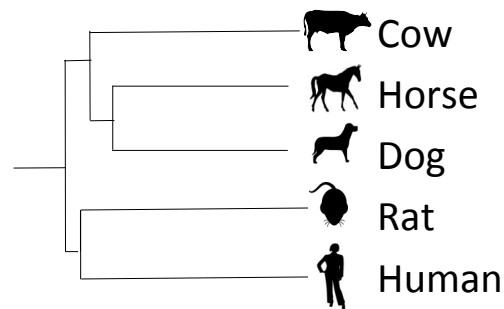

syntenic

non-syntenic

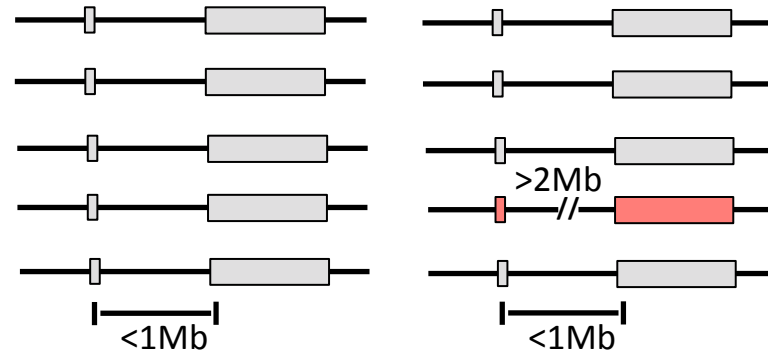**B**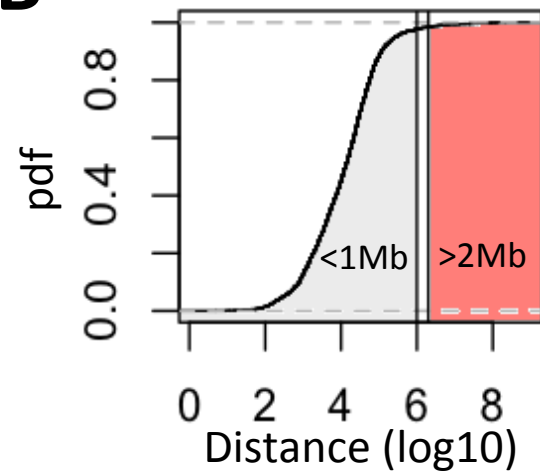**C**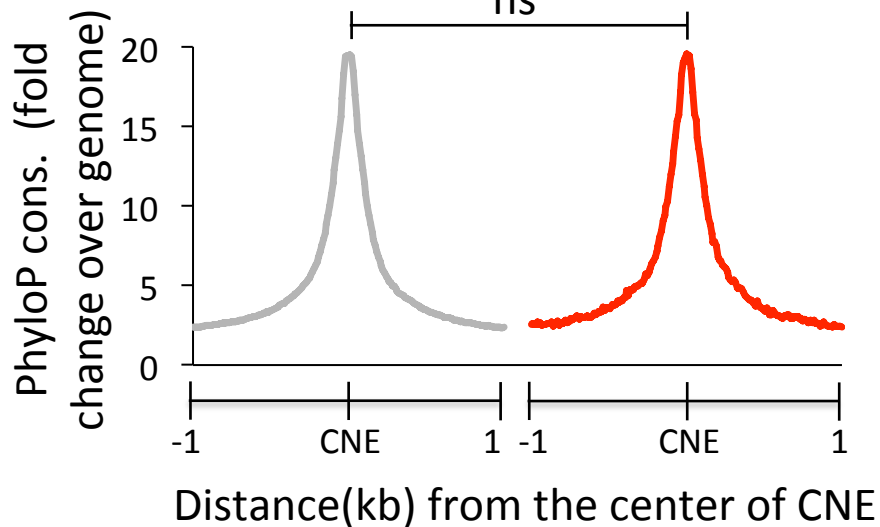**D**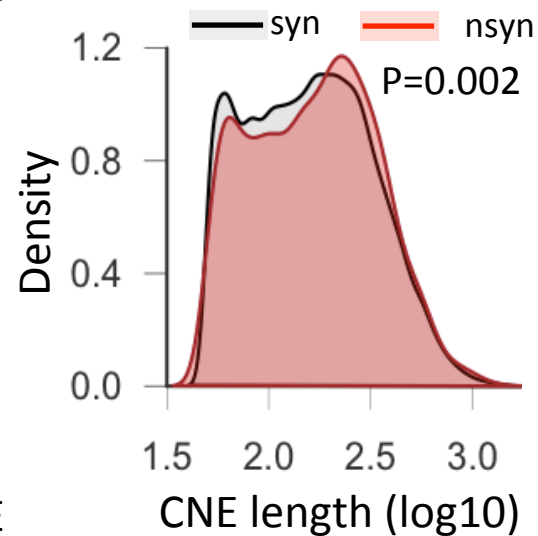**E**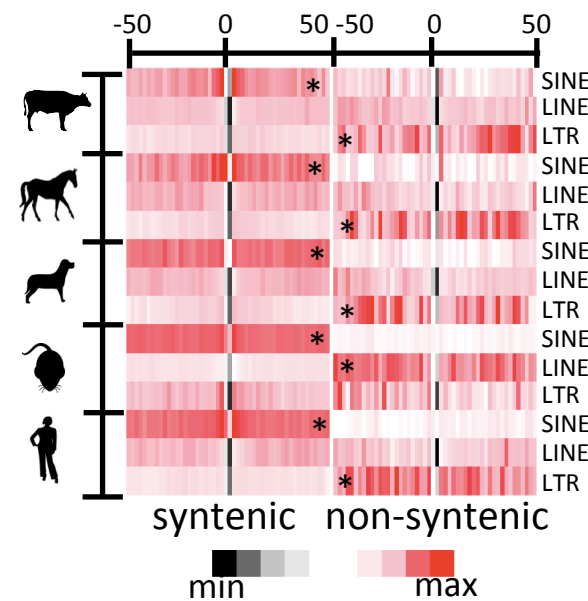

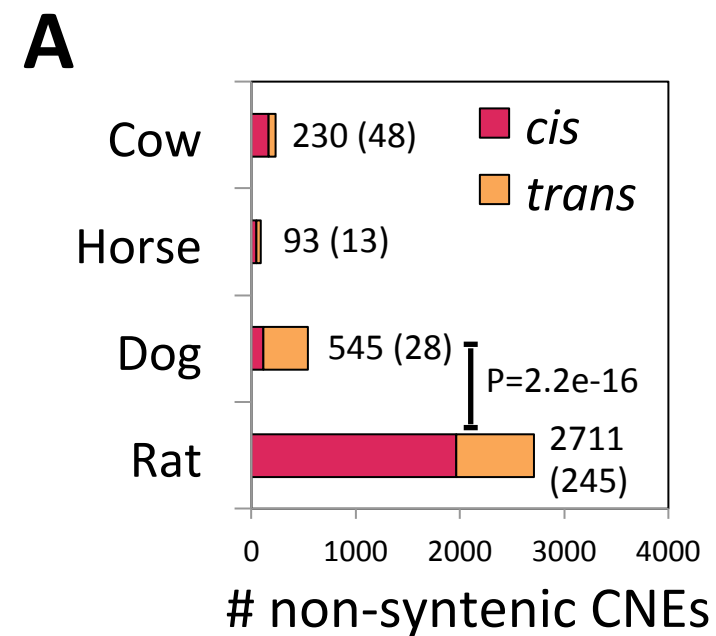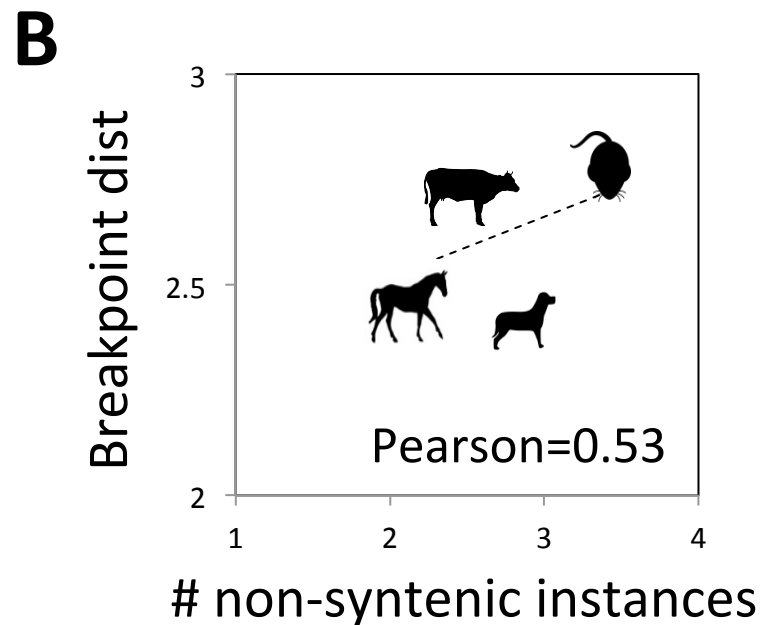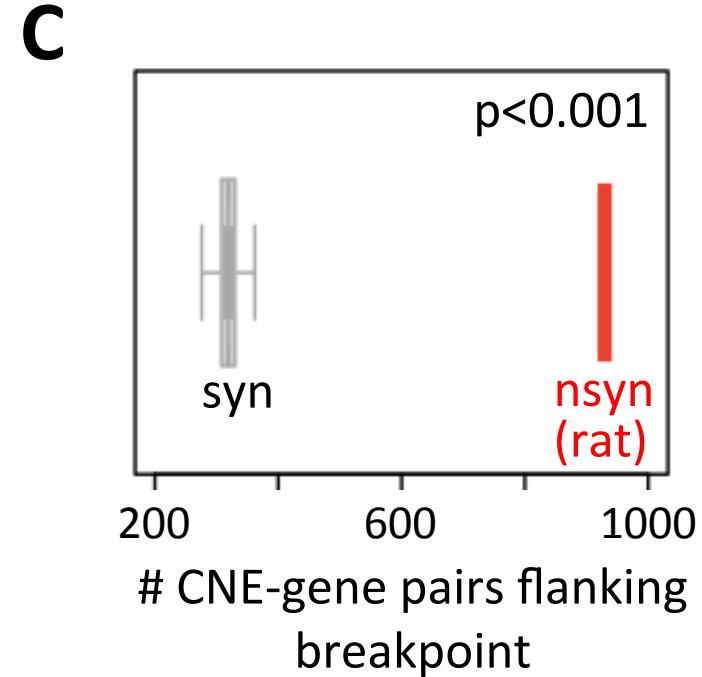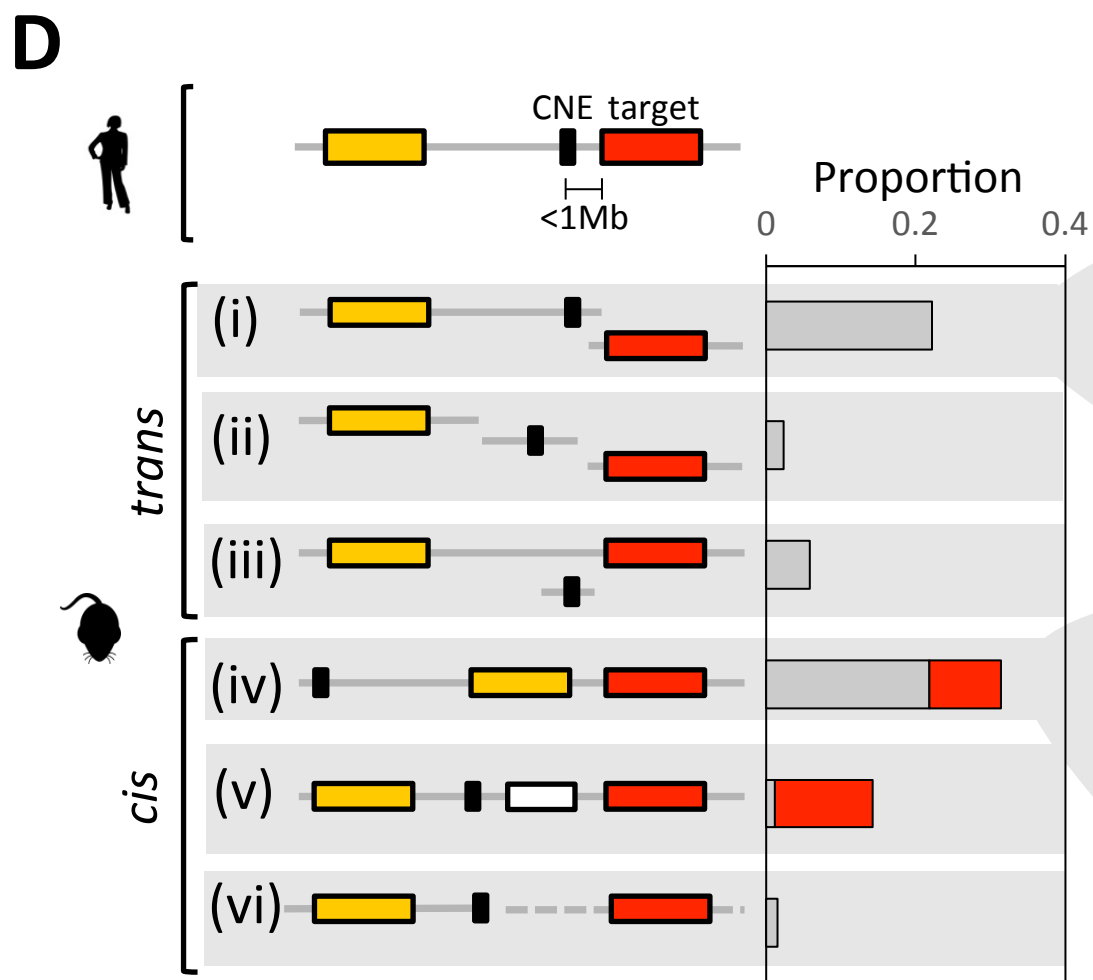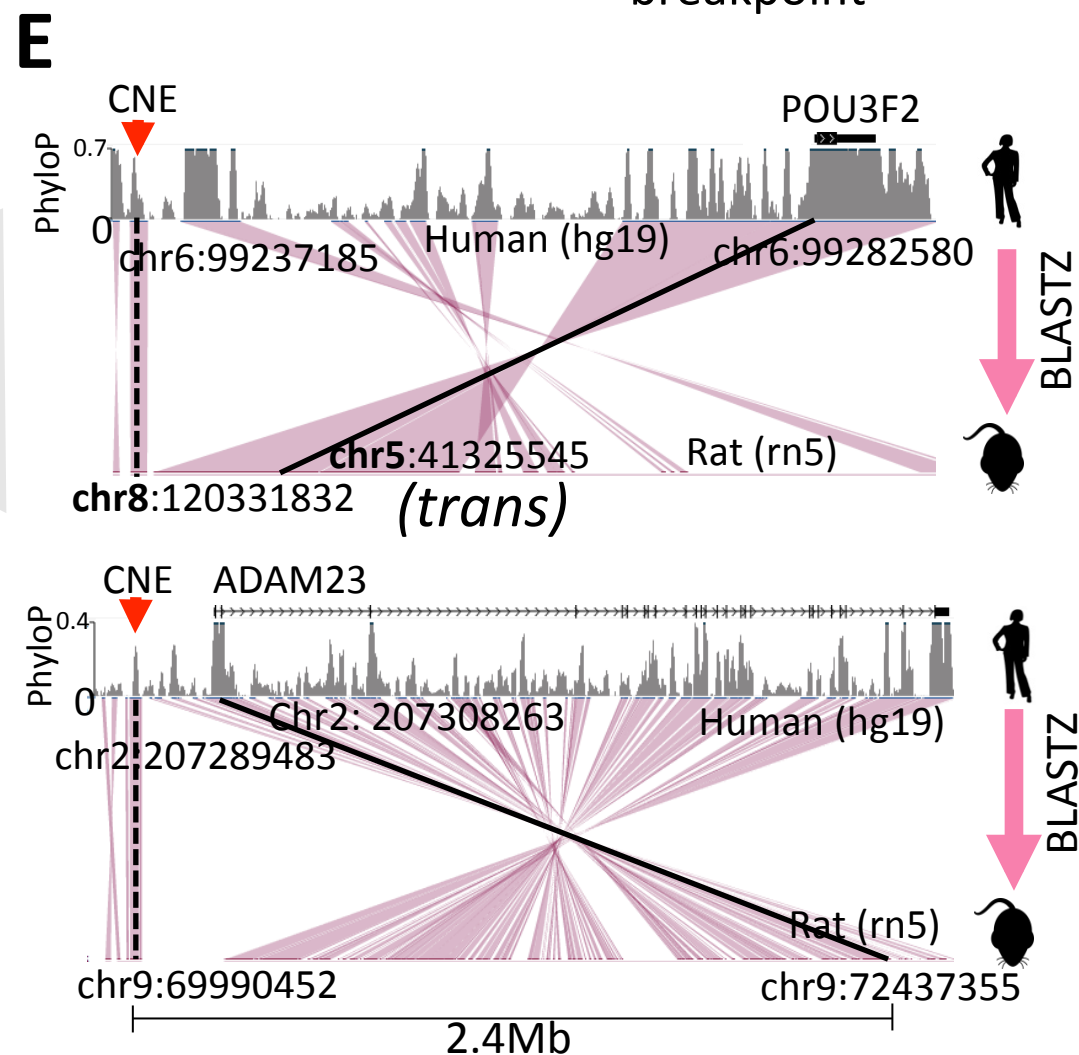



A

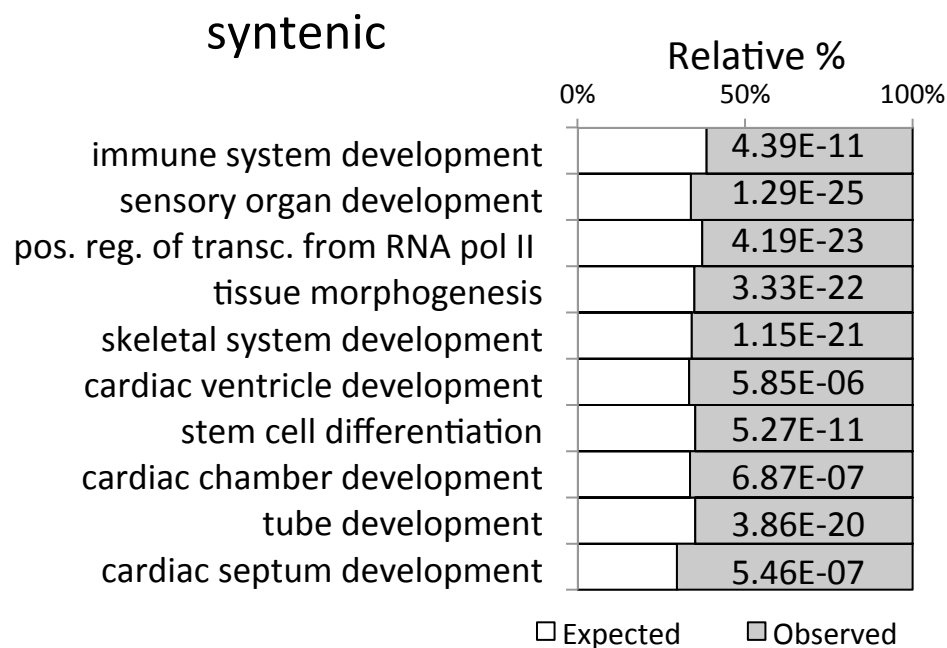

non-syntenic (rat)

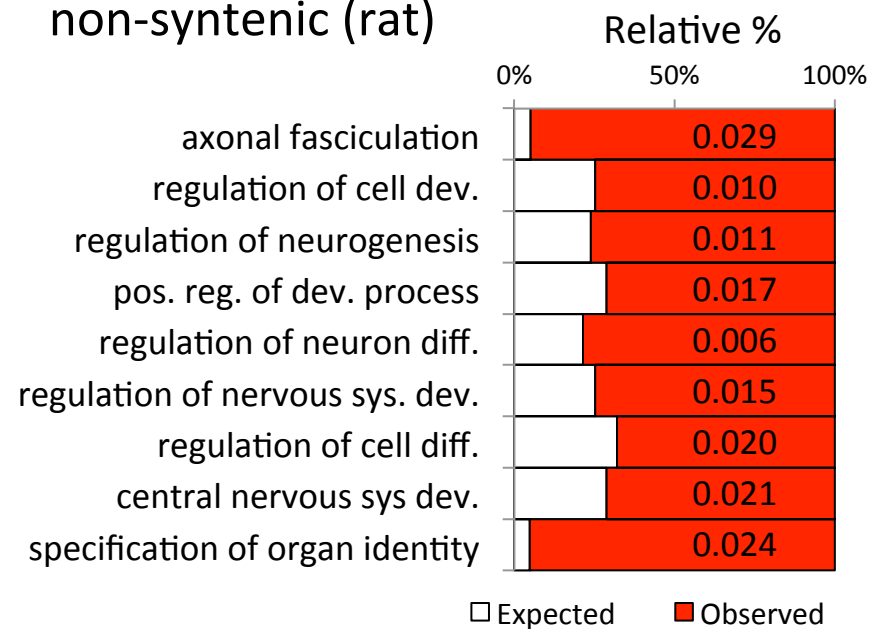

B

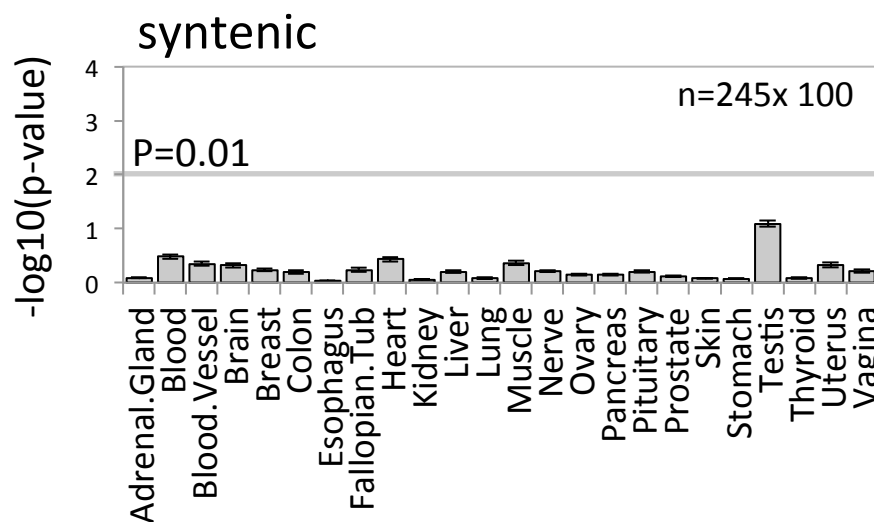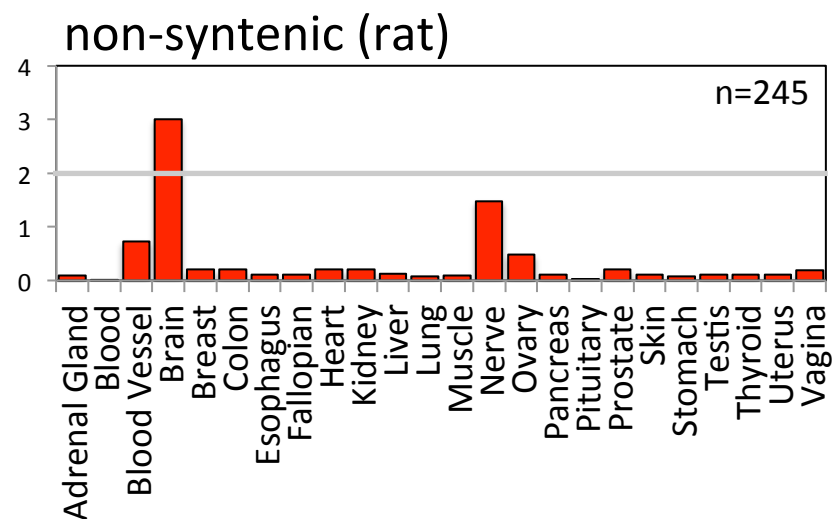

C

syntenic

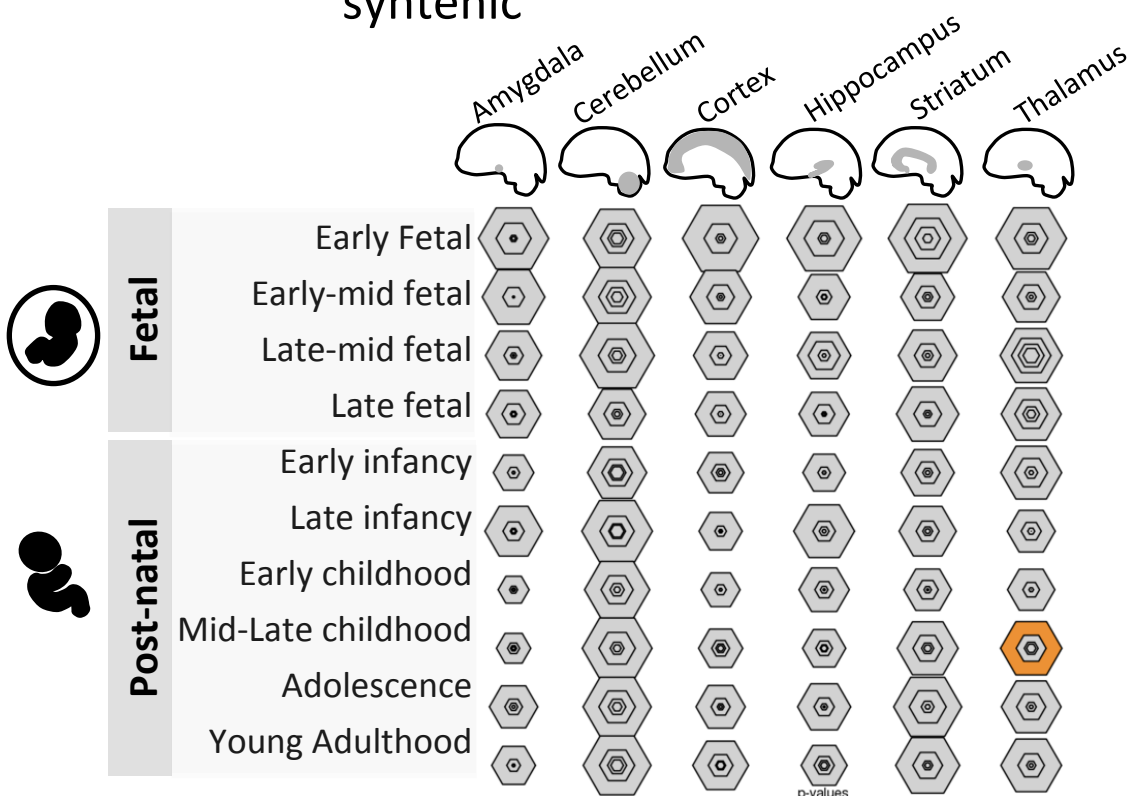

non-syntenic (rat)

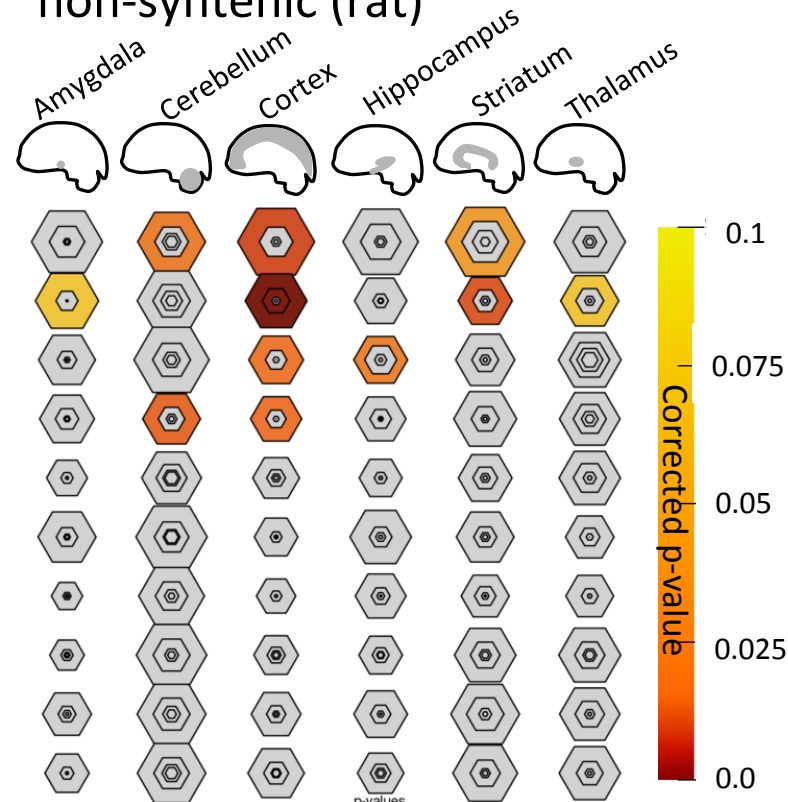

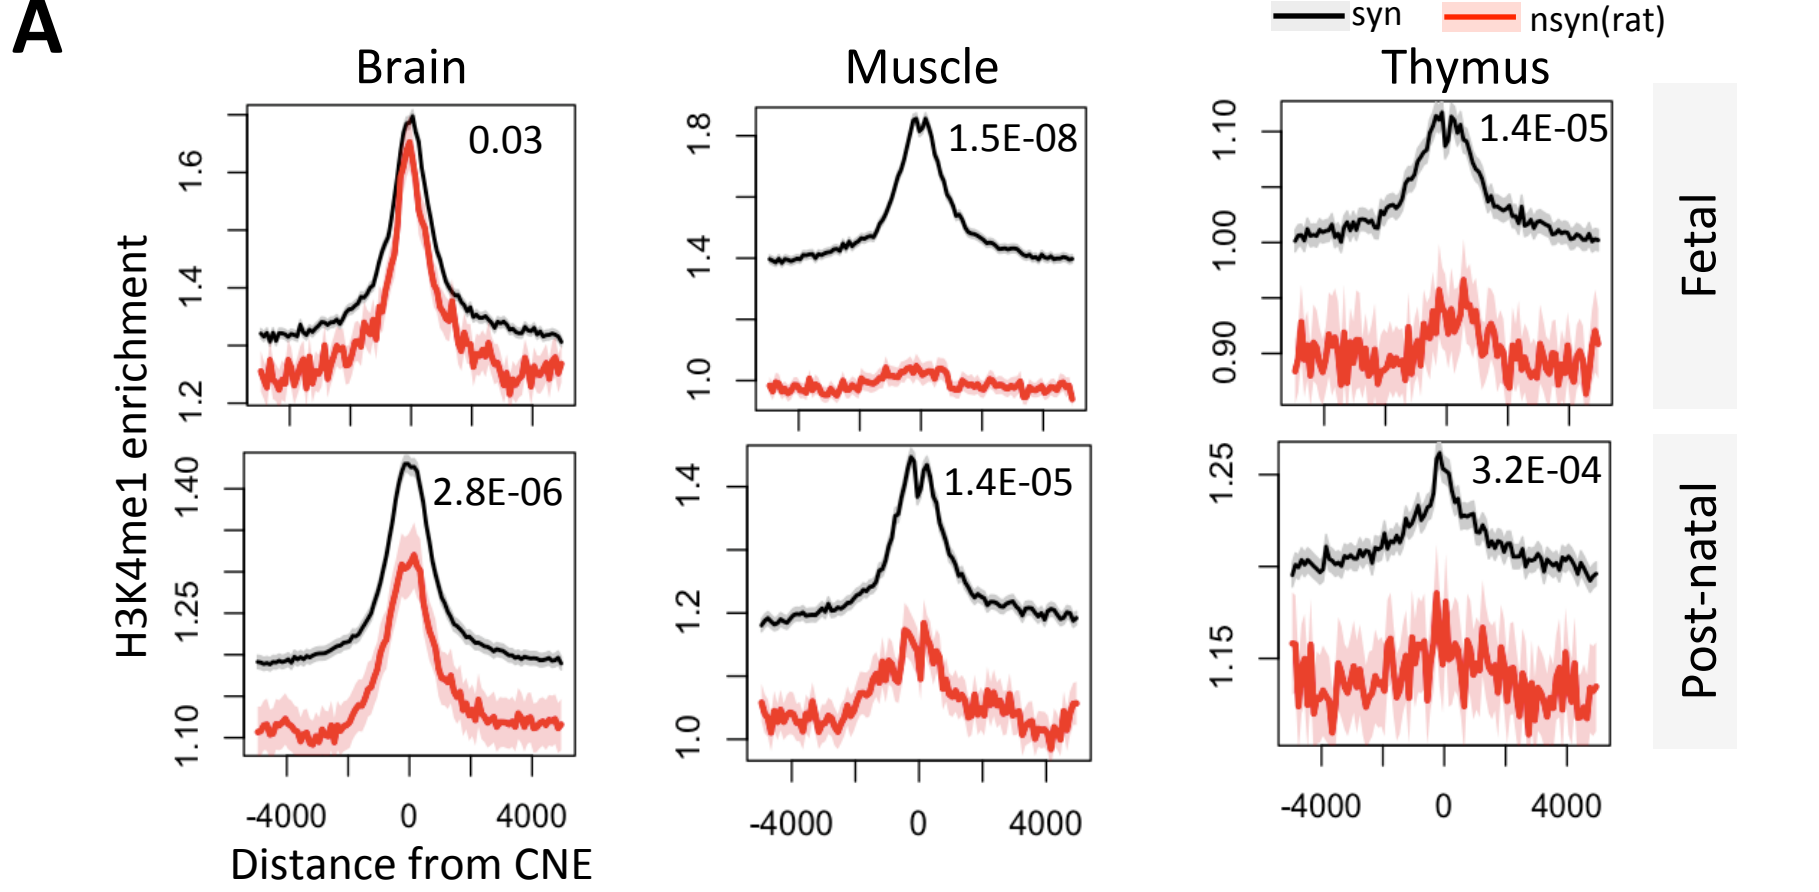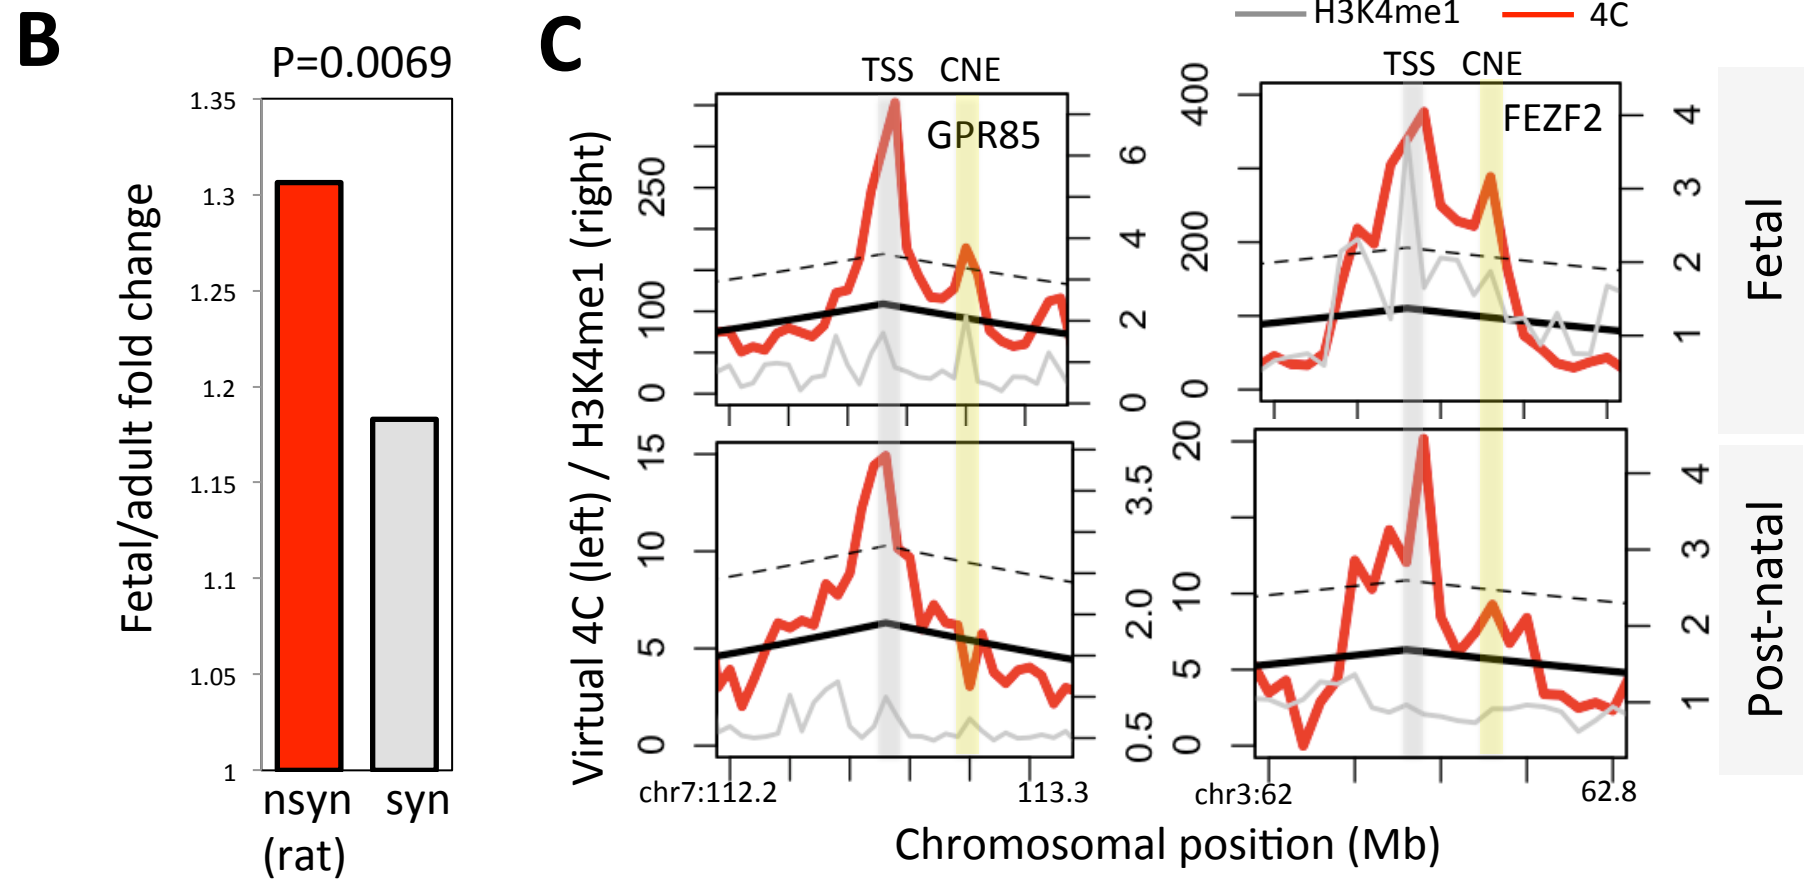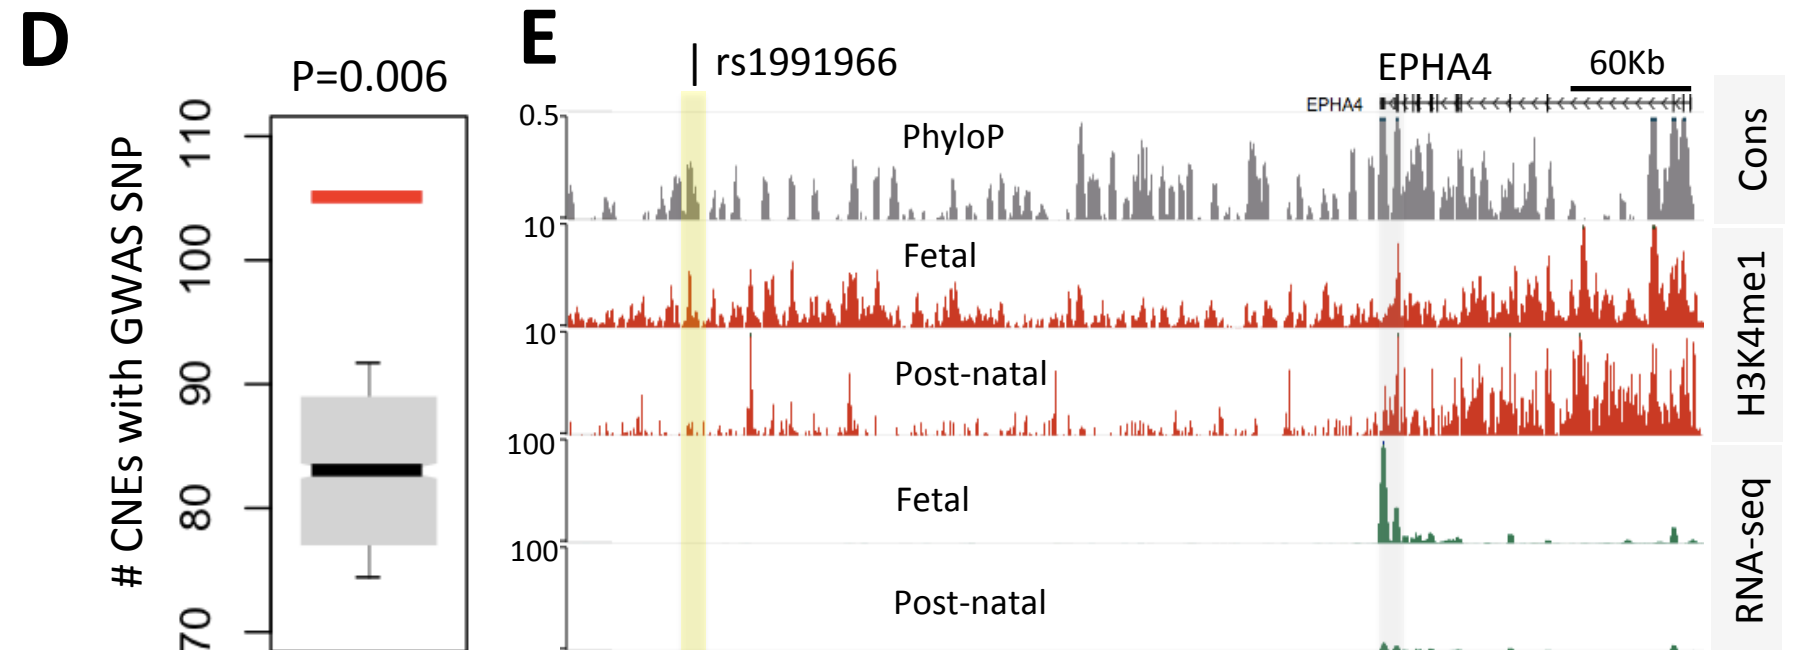

**A**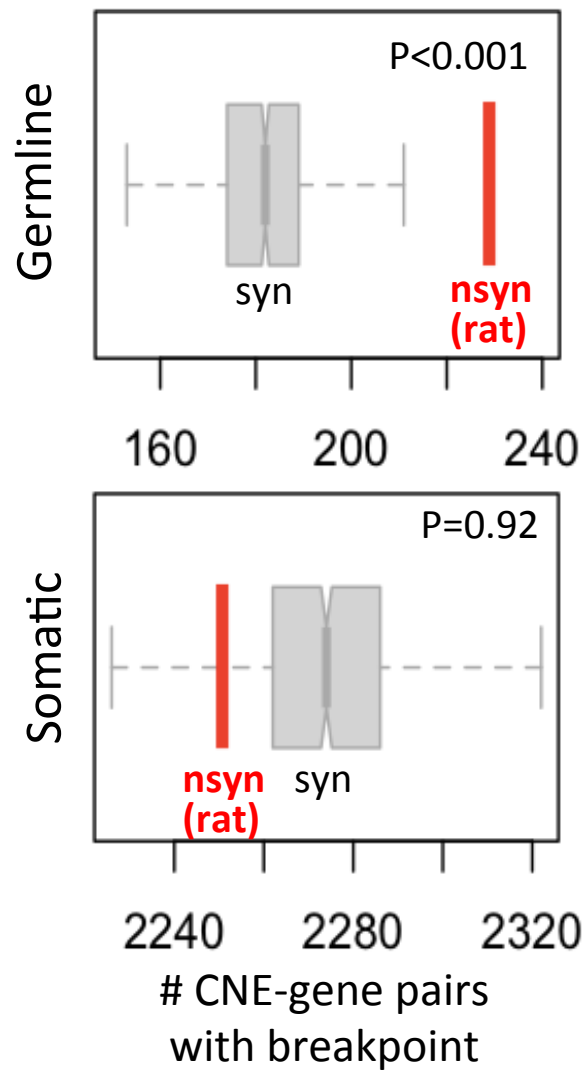**B**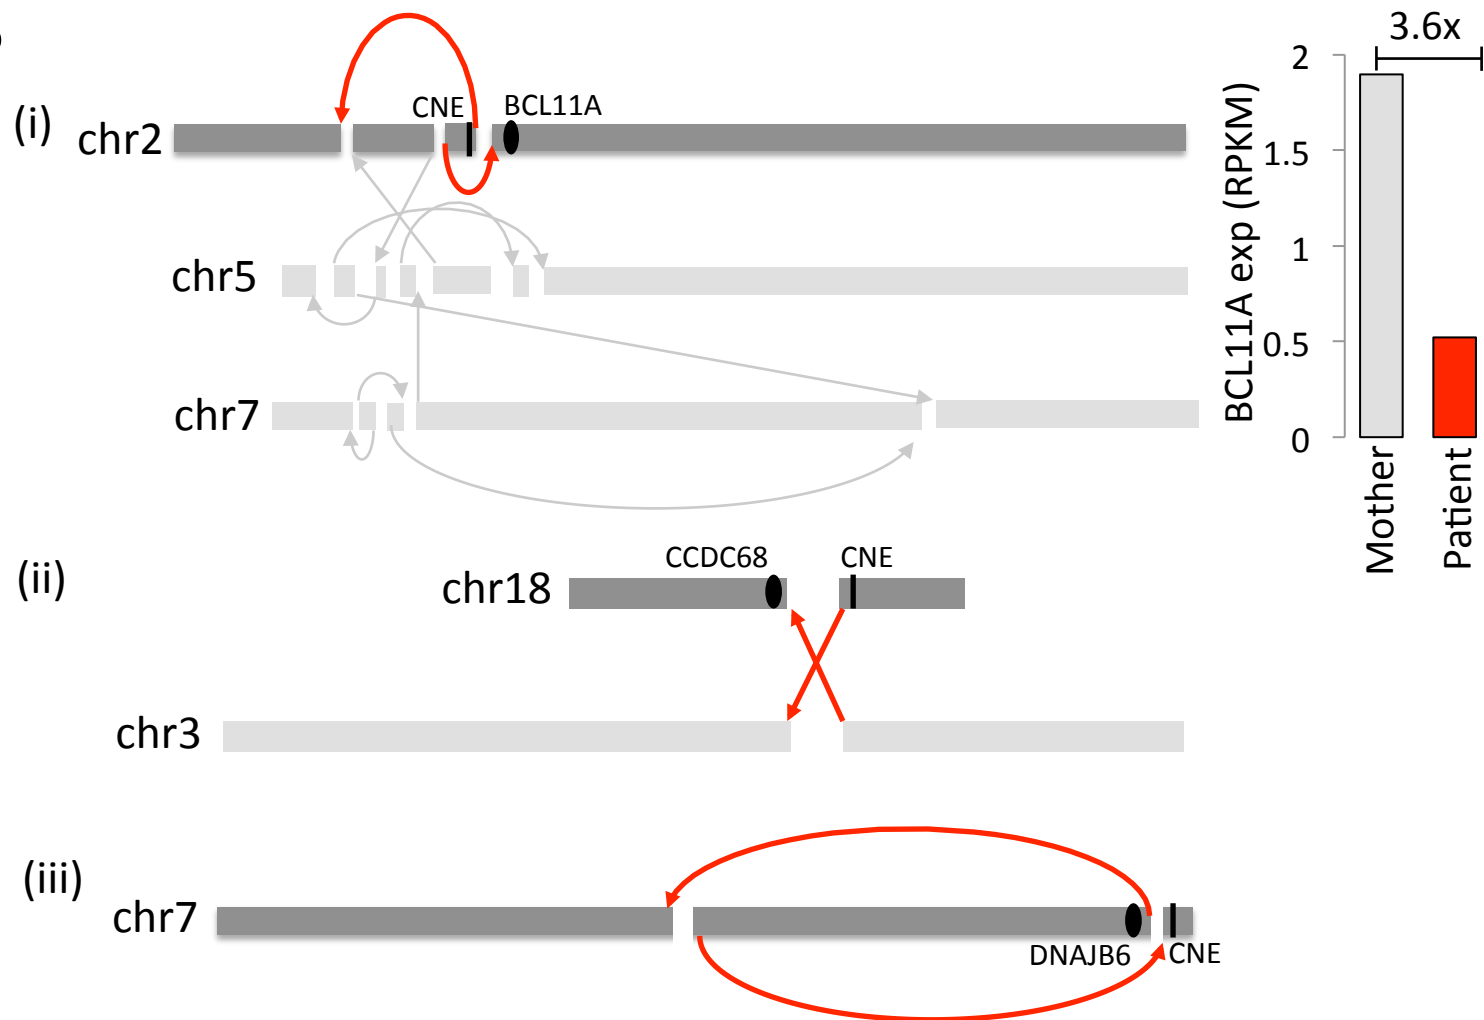

Loss of synteny

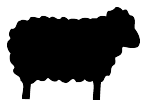

Sheep

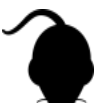

Rat

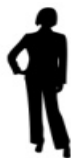

Human

Cerebral Cortex

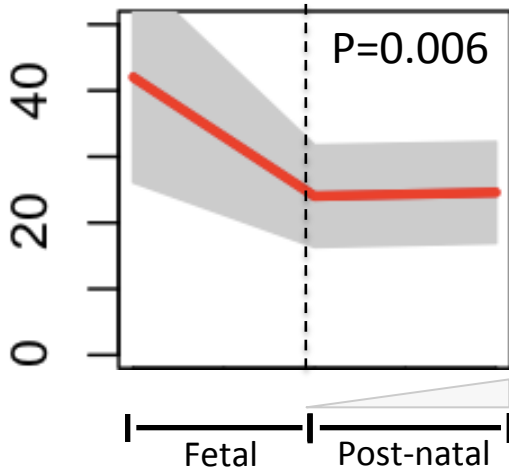

Gene expression (a.u.)

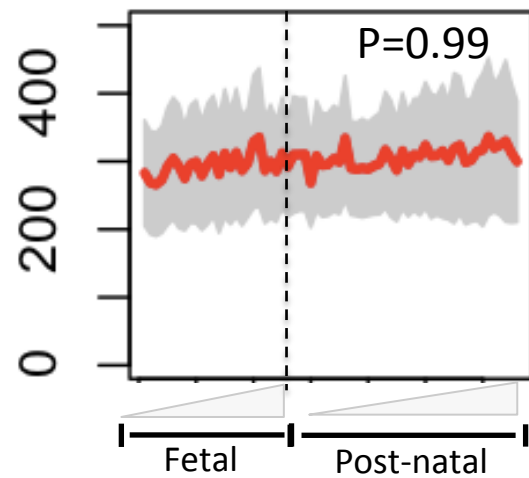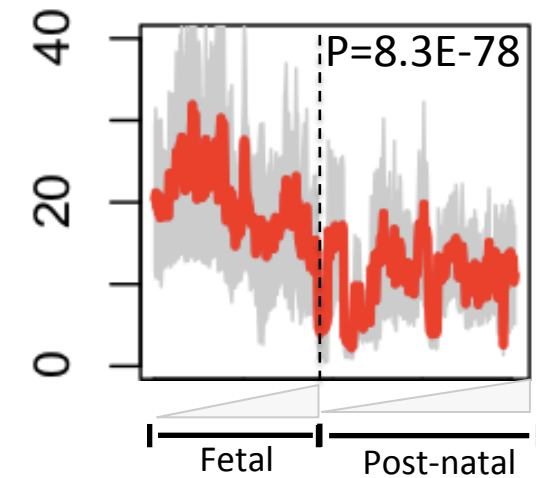

Heart

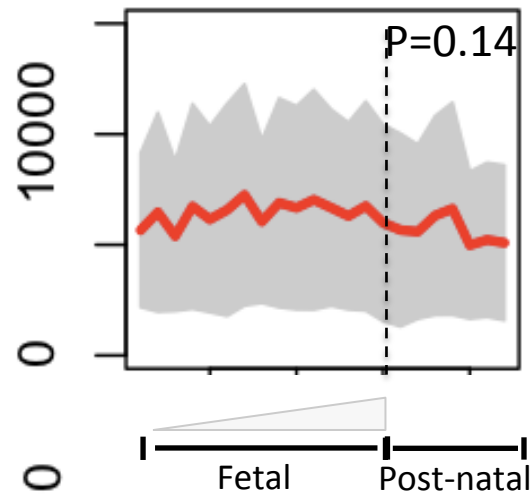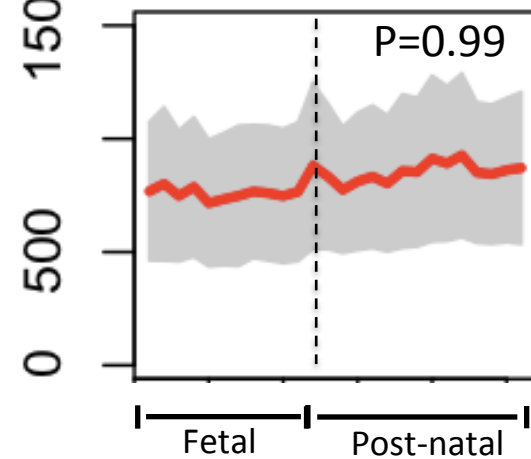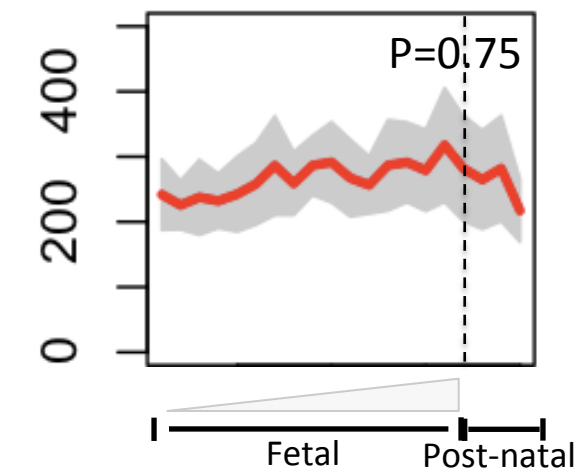

Source: https://www.biorxiv.org/content/10.1101/127563v3.full.pdf
